1 **TRPM2 deficiency protects against atherosclerosis by inhibiting TRPM2-CD36 inflammatory axis in**  
2 **macrophages**

3

4

5 Pengyu Zong<sup>1</sup>, Jianlin Feng<sup>1</sup>, Zhichao Yue<sup>1</sup>, Albert S. Yu<sup>1</sup>, Yasuo Mori<sup>2</sup>, Lixia Yue<sup>1,\*</sup>

6

7

8

9 <sup>1</sup> Department of Cell Biology, Calhoun Cardiology Center, University of Connecticut School of Medicine (UConn  
10 Health), Farmington, CT 06030, USA

11 <sup>2</sup> Laboratory of Molecular Biology, Department of Synthetic Chemistry and Biological Chemistry, Graduate  
12 School of Engineering, Kyoto University, Katsura Campus A4-218  
13 Nishikyo-ku, Kyoto 615-8510, Japan

14

15

16

17 \*Corresponding author: Lixia Yue: [lyue@uchc.edu](mailto:lyue@uchc.edu)

18

19

20

21 **HIGHLIGHTS**

- 22 • *Trpm2* deletion protects against atherosclerosis in *ApoE*<sup>-/-</sup> mice fed with a high-fat diet (HFD)
- 23 • *Trpm2* deficiency reduces atherosclerotic lesions by minimizing foam cell formation, inhibiting
- 24 macrophage infiltration and preserving macrophage emigration
- 25 • TRPM2 activation is required for CD36-induced oxLDL uptake and subsequent inflammatory responses
- 26 • The ligands of CD36, oxLDL and TSP1, activate TRPM2, thereby perpetuating TRPM2-CD36
- 27 inflammatory cycle in atherosclerosis cascade
- 28 • Our data establish TRPM2-CD36 axis as a new atherosclerosis mechanism and TRPM2 as a novel
- 29 therapeutic target for atherosclerosis

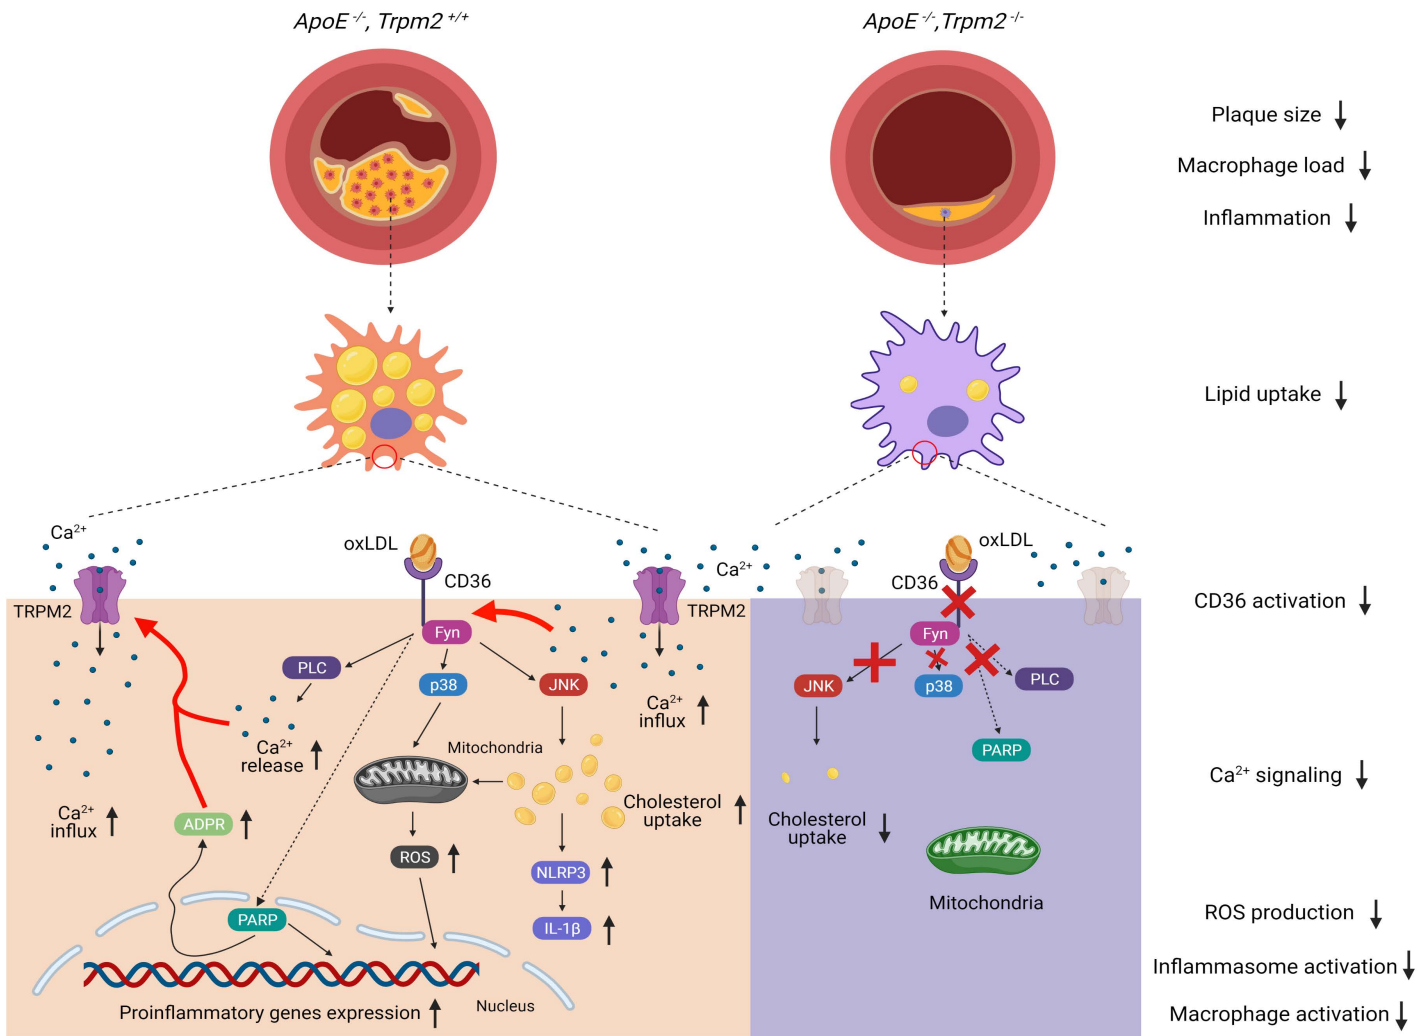

ADPR: Adenosine diphosphate ribose; PARP: Poly-ADP-ribose polymerase; PLC: Phospholipase C; ROS: Reactive oxygen species; NLRP3: NLR family pyrin domain containing 3

30 TRPM2-mediated Ca<sup>2+</sup> signal is essential for CD36 induced oxLDL uptake and atherosclerosis in *ApoE*<sup>-/-</sup> mice fed

31 with a high-fat diet (HFD). The activation of CD36 and TRPM2 form a positive feedback loop in atherosclerosis.

32 **ABSTRACT**

33 Atherosclerosis is the major cause of ischemic heart diseases and ischemic brain stroke, which are the leading causes  
34 of mortality worldwide. The central pathological features of atherosclerosis include macrophage infiltration and  
35 foam cell formation. However, the detailed mechanisms regulating these two processes remain unclear. Here we  
36 show that oxidative stress-activated Ca<sup>2+</sup>-permeable TRPM2 plays a key role in the pathogenesis of atherosclerosis.  
37 *Trpm2* deletion produces a potent protective effect against atherosclerosis in *ApoE*<sup>-/-</sup> mice fed with a high-fat diet  
38 (HFD), as evidenced by reduced atherosclerotic plaque burden, decreased macrophage load and suppressed  
39 inflammasome activation in the vessel wall. Moreover, we show that *Trpm2* deletion or inhibition reduces oxidized  
40 low-density lipoprotein (oxLDL) uptake by macrophages, suppresses macrophage infiltration induced by monocyte  
41 chemoattractant protein-1 (MCP1), and prevents the impairment of macrophage emigration caused by oxLDL.  
42 Intriguingly, we uncover that activation of CD36, an oxLDL receptor, can promote the activation of TRPM2, and  
43 vice versa, the CD36-mediated inflammatory cascade in atherosclerosis is dependent on TRPM2. In transfected  
44 HEK293T cells, CD36 ligands oxLDL and TSP1 induce TRPM2 activation in a CD36-dependent manner. Deleting  
45 *Trpm2* or inhibiting TRPM2 activity in cultured macrophages suppresses the CD36 signaling cascade induced by  
46 oxLDL and TSP1. Our studies establish TRPM2-CD36 axis as a new mechanism underlying atherogenesis, and  
47 suggest TRPM2 as an effective therapeutic target for atherosclerosis.

48

49

50 **KEY WORDS**

51 Atherosclerosis, TRPM2, macrophages, CD36, oxLDL, TSP1

52

## 53 INTRODUCTION

54 Atherosclerosis and its complications, such as myocardial infarction and stroke, are the leading cause of death  
55 worldwide<sup>1</sup>. Atherosclerosis is considered a chronic inflammatory disease of vessel wall. The initial and central  
56 pathological feature of atherosclerosis is the formation of foam cells after infiltrated macrophages phagocytize  
57 oxidized low density lipoprotein (oxLDL) and become overloaded with cholesterol<sup>2</sup>. These lipid-laden macrophages  
58 are the culprit for the progression of atherosclerotic lesions by secreting pro-inflammatory cytokines and matrix-  
59 degrading proteases, which cause profound inflammatory responses and tissue damage in vessel wall<sup>3</sup>. Therefore,  
60 inhibiting foam cell formation and inflammatory cytokine production could be a promising target for developing  
61 more effective therapies for atherosclerosis<sup>1</sup>.

62 The phagocytosis of oxLDL by macrophages is mediated by several scavenger receptors. CD36 is the most  
63 predominant oxLDL receptor as it is responsible for over 70% of oxLDL uptake<sup>4</sup>. The binding of oxLDL to CD36  
64 not only triggers internalization of cholesterol, but also elicits downstream signaling cascades, including Fyn, JNK  
65 and p38, which further induces oxidative stress and expression of pro-inflammatory genes<sup>5</sup>. Moreover, binding of  
66 oxLDL to CD36 promotes the activation of NLRP3 inflammasome by interacting with Toll like receptor 4 and 6  
67 (TLR4/6) heterodimer, driving the differentiation of macrophages toward a pro-inflammatory phenotype<sup>6</sup>. Thus,  
68 CD36 plays a critical role in the activation of macrophages and formation of foam cells in atherosclerotic lesions.  
69 However, the underlying mechanisms regarding how oxLDL binding triggers the activation of the CD36 signaling  
70 cascade in atherogenesis remain unclear<sup>4,7</sup>.

71 TRPM2 is a nonselective cation channel activated by reactive oxygen species (ROS), intracellular Ca<sup>2+</sup>, and ADP-  
72 ribose (ADPR)<sup>8-10</sup>, which are substantially generated in inflammatory responses<sup>11</sup>. TRPM2 is widely expressed in  
73 myeloid cells, and TRPM2 mediated Ca<sup>2+</sup> signaling is important for macrophage activation and phagocytic  
74 functions<sup>12,13</sup>. Knockout of *Trpm2* was found to reduce the production of ROS in macrophages and mitigate tissue  
75 damage in a lung injury mouse model<sup>14</sup>. However, whether TRPM2 is involved in foam cell formation and  
76 atherogenesis is unknown. Considering atherosclerosis is also an inflammatory disease and TRPM2 is activated by

77 oxidative stress under inflammatory conditions, we proposed that TRPM2 plays a key role in atherogenesis by  
78 integrating extracellular stimuli and intracellular signaling cascade.

79 In this study, we demonstrate that *Trpm2* deletion protects *ApoE*<sup>-/-</sup> mice against HFD-induced atherosclerosis,  
80 characterized by reduced atherosclerotic lesions, decreased macrophage burden, and suppressed inflammasome  
81 activation in the vessel wall. We find that deletion of *Trpm2* or inhibiting the activation of TRPM2 in macrophages  
82 reduces oxLDL uptake, inhibits macrophage infiltration, and improves the impaired macrophage emigration. We  
83 reveal that the mechanism by which *Trpm2* deletion inhibits macrophage uptake of oxLDL is mediated by reduced  
84 CD36 activity. Moreover, we demonstrate that TRPM2 can be activated by the CD36 ligands in a CD36 dependent  
85 manner. Our studies establish a novel, mutually regulating, and positive feedback mechanism between CD36 and  
86 TRPM2 in atherogenesis. Targeting TRPM2 inhibits both TRPM2-dependent and CD36-dependent inflammatory  
87 response thereby producing strong protective effects against atherosclerosis.

## 88 RESULTS

### 89 ***Trpm2* deletion protects *ApoE*<sup>-/-</sup> mice from high-fat diet induced atherosclerosis**

90 To investigate whether TRPM2 plays a role in atherosclerosis, *Trpm2*<sup>-/-</sup> mice were crossed with *ApoE*<sup>-/-</sup> mice.  
91 Successful *Trpm2* deletion was confirmed by PCR (Supplementary Fig. 1a), Western blot (Supplementary Fig. 1b)  
92 and whole-cell current recordings (Supplementary Fig. 1c-e). After mice were fed with a high-fat food (HFD) for 4  
93 months, *ApoE*<sup>-/-</sup> mice developed severe atherosclerosis, with a lesion ratio of 0.36±0.17. In contrast, *Trpm2* and  
94 *ApoE* double knockout mice exhibited significantly reduced atherosclerotic plaque lesion ratio (0.13±0.02)  
95 compared with *ApoE* single knockout (Fig. 1a,b), indicating that *Trpm2* deletion protects mice against  
96 atherogenesis.

97 Atherosclerosis is a chronic inflammatory disease and is associated with systemic inflammation<sup>15,16</sup>. Indeed, in  
98 *ApoE* single knockout mice fed with HFD for 4 months, there was a dramatic increase of interleukin-1β (IL-1β)  
99 level in serum compared to mice fed with regular chow (430.70±73.69 pg/mL), whereas this increase was  
100 significantly attenuated in *Trpm2* and *ApoE* double knockout mice (138.03±27.10 pg/mL) (Fig. 1c). This decrease

101 of circulating IL-1 $\beta$  might result from the alleviated atherosclerotic lesion on aorta, and indicates that global *Trpm2*  
102 deletion attenuates systemic inflammation caused by HFD treatment in *ApoE*<sup>-/-</sup> mice. Consistent with the role of  
103 TRPM2 in systemic inflammation, TRPM2 current amplitude recorded in peritoneal macrophages isolated from  
104 HFD fed mice was significantly larger than that from regular chow fed mice (Fig. 1g-i).

105 Macrophage infiltration plays a critical role in the initiation and progression of atherosclerosis<sup>3</sup>. To understand  
106 whether TRPM2 plays a role in macrophage infiltration, we evaluated M1 macrophages, a pro-inflammatory  
107 subtype, in the atherosclerotic vessel by using immunostaining with anti-CD80. We found that the number of F4/80  
108 and CD80 positive macrophages in atherosclerotic plaque was reduced from 61.00 $\pm$ 7.80 per x 10 field in *ApoE*  
109 single knockout mice to 20.75 $\pm$ 5.11 per x 10 field in *Trpm2* and *ApoE* double-knockout mice (Fig. 1d-f), indicating  
110 that macrophage burden is significantly reduced by *Trpm2* deletion. Consistent with the reduced macrophage  
111 numbers, the expression level of CD11b, another surface marker of macrophages, as well as CD80 assessed by  
112 Western blot, were markedly lower in the aorta of *Trpm2* and *ApoE* double-knockout mice than *ApoE* single-  
113 knockout mice after 4-month HFD treatment (Fig. 1j,k). These data indicate that *Trpm2* deletion inhibits the increase  
114 of macrophage burden in aorta during atherogenesis.

115 Macrophage infiltration in atherosclerosis is mainly influenced by two chemokines, monocyte chemoattractant  
116 protein-1 (MCP1) and macrophage migration inhibitory factor (MIF)<sup>17</sup>. At the initial stage of atherosclerosis, MCP1  
117 secreted by endothelial cells upon subendothelial oxLDL deposition is a major cause of macrophage infiltration<sup>3</sup>,  
118 whereas during the progression of atherosclerosis, MCP1 and MIF secreted by activated macrophages themselves  
119 and smooth muscle cells further aggregate the infiltration of macrophages<sup>17-20</sup>. Moreover, MCP1 and MIF promotes  
120 the differentiation of macrophages toward a pro-inflammatory phenotype<sup>20,21</sup>. To understand the mechanisms by  
121 which *Trpm2* deletion reduces macrophage burden, we analyzed the expression levels of MCP1 and MIF in the  
122 atherosclerotic aorta by WB. *Trpm2* deletion drastically reduced both MCP1 and MIP levels in the aorta of *ApoE*<sup>-/-</sup>  
123 mice fed with a HFD for 4 months (Fig. 1l,m). These data strongly suggests that *Trpm2* deletion reduces the number  
124 of macrophages in the lesion area (Fig. 1d) by inhibiting MCP1 and MIP expression.

125 Macrophages that infiltrate into the atheroprone site quickly become the center of inflammatory cues. Inducible  
126 nitric oxide synthase (iNOS) was previously found to be abundantly expressed in human atherosclerotic lesions<sup>22</sup>.  
127 Since iNOS shifts the production of nitric oxide by NOS toward the production of ROS and promotes the activation  
128 of macrophages<sup>23</sup>. Therefore, we evaluated whether iNOS expression is influenced by TRPM2. We found that  
129 *Trpm2* deletion significantly inhibited the increase of iNOS expression in aorta after HFD treatment (Fig. 1n,o).

130 Activation of NLRP3 inflammasome by phagocytized cholesterol crystals in macrophages is required for  
131 atherogenesis<sup>24</sup>. We therefore determined whether TRPM2 is involved in inflammasome activation. Our result  
132 showed that in *ApoE* single knockout mice fed a HFD for 4 months, there was a significant increase of NLRP3,  
133 ASC, cleaved Caspase1 and cleaved IL-1 $\beta$  expression in the aorta compared to the mice fed with regular chow,  
134 whereas this increase was attenuated in *Trpm2* and *ApoE* double knockout mice (Fig. 1p, q). In summary, the above  
135 results indicate that *Trpm2* deletion reduces macrophage infiltration and mitigates inflammation in aorta induced  
136 by HFD treatment.

137 **Deletion of *Trpm2* reduces the uptake of oxLDL by macrophages, suppresses macrophage infiltration,**  
138 **preserves macrophage emigration and inhibits macrophage activation *in vitro***

139 Macrophage infiltration is a critical step in initiating atherogenesis<sup>3</sup>. We therefore established a new *in vitro* assay  
140 to examine whether TRPM2 influences the infiltration ability of macrophages (Fig. 2a). Different from previous  
141 reported infiltration assays<sup>25</sup>, aortic endothelial cells isolated from wild-type (WT) mice were plated onto the upper  
142 surface of transwell inserts to better simulate the pathophysiological conditions during atherosclerosis. After  
143 endothelial cells completely covered the upper surface of inserts with 12  $\mu$ m pore size, bone marrow derived  
144 macrophages isolated from either WT or *Trpm2* knockout (M2KO) mice were added into the upper chamber, while  
145 MCP1 was added into the lower chamber to promote macrophage infiltration. 24 h after adding macrophages into  
146 the upper chamber, the 25 mm cover slips on the bottom of the lower chamber were collected for detecting infiltrated  
147 macrophages using F4/80 and CD80 co-staining (Fig. 2b). We found that MCP1 induced a significant increase of  
148 macrophage infiltration into the lower chamber in WT compared to PBS, but this increase was inhibited in M2KO  
149 group (Fig. 2b,c), indicating that *Trpm2* deletion reduces the infiltration ability of macrophages.

150 Macrophage emigration refers to the returning of macrophages from atherosclerotic lesion sites back into  
151 circulation, which is important for atherosclerosis plaque regression<sup>2,19</sup>. However, phagocytizing oxLDL markedly  
152 impairs the migration ability of macrophages, resulting in macrophages being trapped in atherosclerotic areas  
153 thereby sustaining inflammatory responses in the vessel wall<sup>25</sup>. To investigate the role of TRPM2 in macrophage  
154 emigration, we designed a new *in vitro* assay to examine the emigration ability of macrophages (Fig. 2d). All the  
155 steps are the same to the infiltration test shown in Fig. 2a, except that macrophages were preloaded with oxLDL for  
156 24 h (Fig. 2d). We found that preloading with oxLDL dramatically inhibited the migration of macrophages in WT  
157 cells, but not in M2KO cells (Fig. 2e,f). Our results indicate that *Trpm2* deletion not only inhibits macrophage  
158 infiltration induced by MCP1 (Fig. 2a), but also eliminates the impairment of macrophage emigration caused by  
159 oxLDL (Fig. 2b).

160 Over-phagocytosis of oxLDL transforms macrophages into highly pro-inflammatory foam cells and thereby inhibits  
161 macrophage emigration<sup>2</sup>. To determine whether TRPM2 influences oxLDL engulfment, we used Oil Red O staining  
162 to evaluate the formation of foam cells as previously reported<sup>26</sup>. We found that deletion of *Trpm2* markedly inhibited  
163 the uptake of oxLDL in macrophages (Fig. 3a,b). As NLRP3 inflammasome activation induced by uptake of oxLDL  
164 is critical for macrophage activation during atherogenesis<sup>6</sup>, we measured the oxLDL-induced production of IL-1 $\beta$   
165 and found that *Trpm2* deletion inhibited IL-1 $\beta$  secretion induced by oxLDL, indicating that activation of NLRP3  
166 inflammasome was suppressed by *Trpm2* deletion (Fig. 3c).

167 In atherosclerotic plaque, persistent inflammation promotes activated macrophages to secrete MCP1 and MIF,  
168 which lead to the recruitment of more macrophages into the lesion site, thereby resulting in a positive feed-back  
169 vicious cycle that accelerates atherosclerosis progression<sup>3</sup>. We therefore analyzed whether TRPM2 influences  
170 MCP1 and MIF production. Western blot analysis revealed that the expression of MCP1 and MIF were significantly  
171 increased after oxLDL treatment in WT macrophages, but not in M2KO macrophages (Fig. 3d,e), indicating that  
172 deletion of *Trpm2* results in reduced MCP1 and MIF production by macrophages. It is conceivable that the  
173 decreased levels of MCP1 and MIF in *Trpm2* deletion mice result in reduced infiltration and the preserved  
174 emigration of macrophages, thereby leading to reduced macrophage burden in aorta as shown in Fig. 1e.



175 In macrophages, digestion of oxLDL leads to the substantial production of reactive oxygen species (ROS), which  
176 activates signaling pathways such as nuclear factor- $\kappa$ B (NF- $\kappa$ B) pathway, a key signaling cascade in activating  
177 inflammation related genes<sup>23,27</sup>. Rhodamine-123 (R123) imaging is a commonly used method to monitor  
178 mitochondria oxidative stress and ROS production<sup>28,29</sup>. Using real-time recording of R123 fluorescence, we found  
179 that oxLDL induced a marked and rapid increase of R123 signal in WT but not M2KO macrophages within 5 min  
180 of oxLDL exposure (Fig. 3f,g). To understand how TRPM2 influences ROS production, we evaluated the level of  
181 iNOS, a known factor that promotes the production of ROS in macrophages<sup>23</sup>. As shown in Fig. 3h,i, *Trpm2* deletion  
182 significantly inhibited the increase of iNOS expression in macrophages induced by oxLDL.

183 Increased intracellular  $Ca^{2+}$  is crucial for macrophage activation<sup>12,30</sup>. We therefore examined changes of  $Ca^{2+}$   
184 signaling in response to oxLDL stimulation using Fura-2 real-time  $Ca^{2+}$  imaging. We found that oxLDL induced a  
185 robust increase of intracellular  $Ca^{2+}$  concentration in WT macrophages, but this increase was significantly inhibited  
186 in M2KO macrophages (Fig. 3j,k), suggesting that oxLDL-induced intracellular  $Ca^{2+}$  changes are dependent on  
187 TRPM2. As both ROS and  $Ca^{2+}$  signaling are critical for macrophage activation in response to inflammatory  
188 stimulation<sup>13,23,27</sup>, the inhibitory effects of *Trpm2* deletion on ROS production and intracellular  $Ca^{2+}$  signaling  
189 further indicate that knockout of *Trpm2* inhibits oxLDL-mediated activation of macrophages.

#### 190 ***Trpm2* deletion impairs the activation of CD36 signaling cascades by oxLDL and thrombospondin 1 (TSP1)**

191 The strong inhibition of oxLDL uptake as well as its downstream signaling pathways by *Trpm2* deletion prompted  
192 us to investigate the mechanism by which TRPM2 influences oxLDL uptake in atherogenesis. CD36 is the major  
193 receptor mediating oxLDL uptake, and is responsible for over 70% of oxLDL uptake in macrophages<sup>5</sup>. Activating  
194 signaling cascades downstream of CD36, such as Fyn, JNK, and p38 have been shown to promote the activation of  
195 macrophages, and inhibit the emigration of macrophages from atherosclerotic plaques<sup>5,25</sup>. Activation of p38 MAP  
196 kinase and JNK2 are required for foam cell formation<sup>31,32</sup>, and CD36-mediated activation of JNK2 is necessary for  
197 oxLDL uptake<sup>33</sup>. Based on our observation of reduced oxLDL uptake in macrophages and inhibited macrophage  
198 activation by *Trpm2* deletion, we proposed that TRPM2 influences oxLDL-induced atherogenesis by regulating  
199 CD36 function.

200 Indeed, we found that the oxLDL treatment-induced upregulation of CD36 as well as increased phosphorylation of  
201 Fyn, JNK and p38 in WT macrophages were largely minimized in M2KO macrophages (Fig. 4a,b). To exclude the  
202 non-specific effect caused by oxLDL and confirm the role of TRPM2 in activating CD36 signaling cascades, we  
203 used another CD36 ligand TSP1. TSP1 is an extracellular glycoprotein secreted by macrophages and other types of  
204 cells, and is known to promote inflammation<sup>34,35</sup>. TSP1 was found to activate macrophages and promote the  
205 production of tumor necrosis factor  $\alpha$  in macrophages by activating the NF- $\kappa$ B pathway in a CD36-dependent  
206 manner<sup>36</sup>. It was recently demonstrated that deletion of TSP1 protects mice against leptin induced atherosclerosis  
207 by inhibiting the abnormal activation of smooth muscle cells<sup>37</sup>. However, whether TSP1 is involved in HFD induced  
208 atherogenesis remains unknown. We found that similar to oxLDL, TSP1 elicited upregulation of CD36 and  
209 increased phosphorylation of Fyn, JNK, and p38 in WT macrophages but not in M2KO macrophages (Fig 4c,d),  
210 indicating that TPRM2 is critical for the activation of the CD36 signaling cascade.

211 Next, we sought to determine the effects of TRPM2 on TSP1-induced pro-inflammatory cytokine secretion in  
212 macrophages. Fig. 4e,f show that TSP1 induced an increase in MCP1 and MIF1 expression in WT macrophages,  
213 but not in M2KO macrophages. Moreover, TSP1 treatment induced an increase of R123 fluorescence in WT  
214 macrophages but this increase was markedly attenuated in M2KO macrophages (Fig. 4g,h), suggesting that ROS  
215 production induced by TSP1 is inhibited by *Trpm2* deletion. Consistent with the reduced ROS production in M2KO  
216 macrophages, the expression of iNOS was also much lower in M2KO than WT macrophages (Fig. 4i,j), presumably  
217 due to reduced oxLDL uptake through CD36 in M2KO macrophages. These results indicate that *Trpm2* deletion  
218 inhibits TSP1-induced CD36 activation.

219 We next tested the effect of TSP1 on  $Ca^{2+}$  signaling. Interestingly, TSP1 at a lower concentration induced a larger  
220 increase of intracellular  $Ca^{2+}$  concentration than that induced by oxLDL (TSP1 at 10  $\mu$ g/ml vs oxLDL at 50  $\mu$ g/ml)  
221 in macrophages from WT group but not in M2KO group (Fig. 4k,l). Moreover, TSP1 treatment increased the  
222 secretion of IL-1 $\beta$  by macrophages, a marker representing the activation of NLRP3 inflammasome, whereas this  
223 increase was inhibited in M2KO macrophages (Fig. 4m). As the expression of TSP1 was shown to be significantly

224 increased in the aorta with atherosclerotic lesions<sup>38</sup>, our data suggest that TSP1 induced activation of CD36  
225 signaling plays an important role in macrophage activation in atherosclerotic plaques.

226 In summary, the above results suggest that both oxLDL and TSP1 activate CD36 in atherosclerosis, and that deletion  
227 of *Trpm2* inhibits oxLDL and TSP1 induced activation of CD36, indicating that TRPM2 is required for CD36  
228 activation.

### 229 **TRPM2 mediates the activation of CD36 signaling cascades in macrophages induced by oxLDL and TSP1**

230 The requirement of TRPM2 for CD36 activation by oxLDL and TSP1 is an interesting discovery. To understand  
231 the underlying mechanisms, we first determined whether activation of CD36 influences TRPM2 channel function.  
232 We confirmed that TRPM2 can indeed be activated during oxLDL or TSP1 treatment. We found that under the  
233 recording conditions with 500 nM Ca<sup>2+</sup> and 1 μM ADPR in the pipette solution, oxLDL substantially activated  
234 TRPM2 currents in HEK293T cells co-transfected with both TRPM2 and CD36 in 5 min (Fig. 5a). In contrast, there  
235 was no TRPM2 current activation in cells transfected with TRPM2 only, even after perfusion with oxLDL for 10  
236 min (Fig. 5b). The currents activated by oxLDL display typical TRPM2 characteristics such as linear I-V relation  
237 (Supplementary Fig. 2a) and can be blocked by 30 μM N-(p-amylocinnamoyl) anthranilic acid (ACA). Moreover,  
238 preincubation with sulfosuccinimidyl oleate (SSO), a CD36 specific inhibitor, effectively abolished the activation  
239 of TRPM2 by oxLDL (2156.00 ± 342.00 pA vs 50.02 ± 10.65 pA) (Figure 5c, Supplementary Fig. 2a).

240 The activation of TRPM2 needs intracellular Ca<sup>2+</sup> and ADP ribose (ADPR)<sup>39</sup>. Since our pipette solution only  
241 contains 500 nM Ca<sup>2+</sup> and 1 μM ADPR, we reasoned that oxLDL might influence intracellular Ca<sup>2+</sup> or ADPR  
242 thereby activating TRPM2. We found that PJ34, a specific inhibitor for poly ADP-ribose polymerase, abolished  
243 the activation of TRPM2 by oxLDL in HEK293 cells transfected with TRPM2 and CD36 during oxLDL treatment  
244 (Figure 5c, Supplementary Fig. 2a). Similarly, U73122, a potent PLC inhibitor, when used in combination with  
245 extracellular Ca<sup>2+</sup> free recording solution (0.5 mM EDTA), abolished the activation of TRPM2 by oxLDL in  
246 HEK293 cells co-expressed with TRPM2 and CD36 during oxLDL treatment (Figure 5c, Supplementary Fig. 2a).  
247 Furthermore, inhibition of TRPM2 activation using ACA, PJ34, and U73122 (used in combination with Ca<sup>2+</sup> free

248 HBSS culture medium), significantly inhibited the activation of CD36 signaling cascades in macrophages during  
249 oxLDL treatment (Fig. 5d,e). TRPM2 is a non-selective  $\text{Ca}^{2+}$ -permeable cation channel<sup>40</sup>. TRPM2 mediated  $\text{Ca}^{2+}$   
250 signaling was found to be important for various cellular functions<sup>40</sup>. Given *Trpm2* deletion or inhibiting the  
251 activation of TRPM2 produced a similar inhibitory effect on CD36 signaling cascade as using  $\text{Ca}^{2+}$  free medium  
252 (HBSS), our result indicates that TRPM2 mediated  $\text{Ca}^{2+}$  signaling is important for oxLDL activated CD36 signaling  
253 cascades in macrophages.

254 Interestingly, compared to oxLDL, TSP1 treatment induced a more robust activation ( $4117.00 \pm 454.90$  pA by TSP1  
255 versus  $2156.00 \pm 342.00$  pA by oxLDL) of TRPM2 currents in HEK293T cells transfected with both TRPM2 and  
256 CD36 (Fig. 5f), and this activation did not happen in HEK293T cells transfected with TRPM2 alone (Fig. 5g).  
257 Preincubation with SSO completely inhibited the activation of TRPM2 by TSP1 (Figure 5h, Supplementary Fig.  
258 2b). Similar to oxLDL treatment, the activation of TRPM2 by TSP1 disappeared when transfected cells were  
259 preincubated with ACA, PJ34 and U73122 (Figure 5h, Supplementary Fig. 2b). Also, the activation of CD36  
260 signaling pathway in macrophages by TSP1 was significantly inhibited with ACA, PJ34, and U73122 (used in  
261 combination with  $\text{Ca}^{2+}$  free HBSS culture medium) treatment(Fig. 5i,j), likely by inhibiting TRPM2 activation.  
262 Moreover, SSO, ACA, PJ34 and U73122 treatments did not produce an additional effect on the activation of CD36  
263 signaling cascades in macrophages subjected to oxLDL (Supplementary Fig. 3a,b) or TSP1 treatment  
264 (Supplementary Fig. 3c,d), indicating these inhibitors did not affect CD36 in the absence of TRPM2. The above  
265 data suggest that during oxLDL and TSP1 treatment, CD36 signaling activates TRPM2 by increasing the production  
266 of ADPR and intracellular  $\text{Ca}^{2+}$  concentration, and TRPM2 mediated  $\text{Ca}^{2+}$  signaling is also critical for the activation  
267 of CD36 signaling cascades.

### 268 **TRPM2 mediates ROS production, increased $\text{Ca}^{2+}$ concentration and inflammasome activation in** 269 **macrophages induced by oxLDL or TSP1**

270 We then sought to understand whether inhibiting the activation of TRPM2 influences the activation of macrophages  
271 by oxLDL or TSP1. As a negative control, inhibition of CD36 by preincubating macrophages with SSO significantly  
272 mitigated the increase of R123 signal in macrophages induced by either oxLDL (Fig. 6a,c) or TSP1 treatment (Fig.

273 6b,d). Moreover, ACA, PJ34 and U73122 preincubation markedly inhibited the increase of R123 signal in  
274 macrophages induced by either oxLDL (Fig. 6a,c) or TSP1 treatment (Fig. 6b-d). Furthermore, TRPM2 inhibitor  
275 ACA and inhibiting the activation of TRPM2 by PJ34 or U73122 (with  $\text{Ca}^{2+}$  free extracellular medium) inhibited  
276 the expression iNOS in macrophages receiving oxLDL (Fig. 6e,g) and TSP1 treatment (Fig. 6f,h). Notably, SSO,  
277 ACA, PJ34 and U73122 treatments did not additionally inhibit the expression of iNOS in M2KO macrophages  
278 subjected to oxLDL (Supplementary Fig. 3e,f) or TSP1 treatment (Supplementary Fig. 3g,h). Similarly, SSO, ACA,  
279 PJ34 and U73122 preincubation markedly inhibited the increase of intracellular  $\text{Ca}^{2+}$  concentration in macrophages  
280 induced by either oxLDL (Fig. 6i,k) or TSP1 treatment (Fig. 6j-l). These data indicate that inhibiting the activation  
281 of TRPM2 suppressed the production of ROS and the increase of intracellular  $\text{Ca}^{2+}$  concentration in macrophages  
282 during oxLDL or TSP1 treatment. Since ROS and  $\text{Ca}^{2+}$  signaling are critical for the activation of pro-inflammatory  
283 pathways in macrophages<sup>12,27</sup>, we examined whether these inhibitors affect the activation of NLRP3 inflammasome  
284 by measuring the concentration of IL-1 $\beta$  in culture medium. Our data showed that by inhibiting the activation of  
285 TRPM2 using ACA, PJ34 and U73122, the secretion of IL-1 $\beta$  by macrophages induced by oxLDL or TSP1 was  
286 significantly inhibited (Fig. 6m,n). Considering the crucial role of ROS and  $\text{Ca}^{2+}$  signaling in the activation of  
287 macrophages, the above results suggest that inhibition of TRPM2 activation significantly suppresses macrophage  
288 activation induced by oxLDL and TSP1.

### 289 **Inhibiting the activation of TRPM2 in macrophages reduced oxLDL uptake, inhibited macrophage** 290 **infiltration and improved the impaired macrophage emigration**

291 After confirming that inhibiting TRPM2 activation could suppress macrophage activation, we examined whether  
292 these inhibitors affect the phenotypic changes of macrophages induced by oxLDL and TSP1. CD36 inhibitor SSO  
293 significantly inhibited the uptake of oxLDL in macrophages derived from bone marrow (Fig. 7a,b), and TRPM2  
294 inhibitor ACA, as well as PJ34 and U73122 also suppressed oxLDL uptake in macrophages (Fig. 7a,b). Moreover,  
295 the increased expression of MCP1 and MIF induced by oxLDL or TSP1 was inhibited by ACA, PJ34 and U73122  
296 (Fig. 7c-f), whereas these inhibitors did not produce any suppression of MCP1 and MIF expression in M2KO  
297 macrophages subjected to oxLDL (Supplementary Fig. 4a,b) or TSP1 treatment (Supplementary Fig. 4c,d).

298 Furthermore, preincubation with ACA, PJ34 and U73122 inhibited the *in vitro* macrophage infiltration induced by  
299 MCP1 (Fig. 7g,h) and prevented the impairment of emigration ability caused by oxLDL preloading (Fig. 7i,j). These  
300 results recapitulate the reduced oxLDL uptake by macrophages, inhibited macrophage infiltration, and preserved  
301 macrophage emigration by deleting *Trpm2 in vitro* (Fig 2a-f).

## 302 **DISCUSSION**

303 Atherosclerosis is a chronic inflammatory disease with the central pathological features of macrophage infiltration  
304 and foam cell formation<sup>1,2</sup>. However, the precise molecular mechanisms regulating these two critical pathogenesis  
305 processes remain unclear<sup>2</sup>. Mitigating atherosclerosis is essential for minimizing its complications such as  
306 myocardial infarction and ischemic stroke, which are the leading causes of mortality and morbidity<sup>1</sup>. Current  
307 available therapies which only control risk factors of atherosclerosis, such as dyslipidemia, have proven effective  
308 only to some extents<sup>1</sup>, partially because of the poor patient compliance to lifelong lifestyle modification<sup>41</sup>.  
309 Therapeutic strategies which directly target the most important culprit, macrophages, in pathogenesis of  
310 atherosclerosis have been lacking due to our incomplete understanding of atherogenic mechanisms. In this study,  
311 we revealed that TRPM2 plays a key role in promoting the activation of macrophages in atherogenesis, uncovered  
312 the TRPM2-CD36 axis in the pathogenesis of atherosclerosis, and established that targeting TRPM2 in the TRPM2-  
313 CD36 axis could be a new therapeutic strategy for atherosclerosis.

314 TRPM2 is a Ca<sup>2+</sup>-permeable non-selective cation channel activated by oxidative stress<sup>13</sup>, the hallmark of  
315 inflammation<sup>42</sup>. With the unique feature of being activated by oxidative stress, TRPM2 has been implicated in  
316 several pathological conditions including Alzheimer's disease, ischemic stroke, inflammatory bowel disease, and  
317 inflammatory lung injury<sup>43</sup>. However, whether TRPM2 is involved in atherogenesis was unknown. Here, we  
318 demonstrate that *Trpm2* deletion markedly attenuates atherosclerosis in *ApoE*<sup>-/-</sup> mice fed with HFD. We reveal the  
319 mechanism by which *Trpm2* deletion inhibits atherosclerosis is through reducing macrophage burden in  
320 atherosclerotic plaque *in vivo*. These findings are supported not only by reduced lesion size and reduced macrophage  
321 burden *in vivo*, but also by demonstration of inhibited foam cell formation *in vitro*. Moreover, we discovered an  
322 unknown link between TRPM2 and atherosclerosis initiators, the CD36 ligands oxLDL and TSP1. We found that

323 inhibiting TRPM2 markedly suppressed the pro-inflammatory activation of macrophages mediated by oxLDL and  
324 TSP1, both of which have been implicated as potent atherogenic activators<sup>37,38,44</sup>. Our discoveries indicate that  
325 TRPM2 is a novel therapeutic target for atherosclerosis, and the first direct target of the atherogenesis cascade, in  
326 contrast to previous therapies indirectly targeting atherosclerotic risk factors.

327 The gradual increase of trapped macrophages in the vessel wall during atherosclerosis progression results from two  
328 causes: one is the increased number of macrophages infiltrating into the vessel wall, and another is the decreased  
329 number of macrophages emigrating back into circulation. By designing two straightforward *in vitro* experiments to  
330 mimic *in vivo* conditions, we show that deleting *Trpm2* or inhibiting TRPM2 activation in macrophages not only  
331 suppresses macrophage infiltration, but also preserves their emigration ability. MCP1 and MIF, two chemokines  
332 produced by activated macrophages themselves, are critical for recruiting macrophages into atherosclerotic  
333 plaque<sup>18,20</sup>. We found that the increased expression of MCP1 and MIF induced by oxLDL or TSP1 in macrophages  
334 was markedly inhibited by deleting *Trpm2* or inhibiting TRPM2 activation. Uptake of oxLDL significantly inhibits  
335 macrophage migration, which was shown to be the major reason for macrophages being trapped inside vessel wall<sup>25</sup>.  
336 Our data show that inhibiting TRPM2 activation, or deleting *Trpm2* in macrophages, reduces the uptake of oxLDL,  
337 strongly supporting our conclusion that *Trpm2* deletion inhibits foam cell formation.

338 The uptake of oxLDL is predominately mediated by the scavenger receptor CD36<sup>4</sup>. We found that inhibition of  
339 TRPM2 in macrophages *in vitro* or deletion of *Trpm2* *in vivo* not only eliminated up-regulation of CD36 as well as  
340 CD36-mediated oxLDL uptake, but also largely inhibited downstream signaling cascade of CD36 induced by  
341 oxLDL and TSP1, indicating that TRPM2 is necessary for CD36 activation and the subsequent inflammatory  
342 responses. Moreover, TRPM2 channel inhibitor ACA, or inhibiting the activation of TRPM2 using PJ34/U73122,  
343 exhibited similar effect to that of *Trpm2* deletion, suggesting that TRPM2-mediated Ca<sup>2+</sup> is necessary for CD36  
344 activation.

345 One of the intriguing discoveries in this study is the TRPM2 activation mediated by CD36 ligands oxLDL and  
346 TSP1, which can be blocked by CD36 inhibitor SSO. The activation of TRPM2 by TSP1 may provide new  
347 mechanistic insights about the important role of TSP1 in atherosclerosis shown in a recent study<sup>37</sup>. We uncovered

348 that the mechanisms by which oxLDL and TSP1 activate TRPM2 is through ROS production as measured by R123.  
349 ROS production and mitochondrial oxidative stress in macrophages is known to promote macrophage activation in  
350 atherosclerotic plaques and accelerate the progression of atherosclerosis<sup>27</sup>. By utilizing R123 real-time cell imaging,  
351 we demonstrated for the first time that oxLDL and TSP1 induced a rapid increase of ROS production and  
352 mitochondrial oxidative stress in cultured macrophages. The increased ROS and oxidative stress promote ADPR  
353 production. As CD36 activation also leads to PLC $\gamma$  activation which enhances intracellular Ca<sup>2+</sup><sup>45</sup>, the enhanced  
354 ADPR and Ca<sup>2+</sup> will further activate TRPM2, resulting in a mutually activating feedback loop between TRPM2 and  
355 CD36, which perpetuates the inflammatory response in atherosclerosis. To our knowledge, this is the first report  
356 demonstrating inter-dependent positive feedback regulating mechanism between TRPM2 and CD36 in promoting  
357 atherosclerosis. As CD36 is the most important molecule for oxLDL uptake in macrophages<sup>5</sup> which results in foam  
358 cell formation and inflammatory responses, this new TRPM2-CD36 axis in atherogenesis suggest that TRPM2 may  
359 serve as a novel and effective therapeutic target for atherosclerosis.

360 The TRPM2-CD36 axis constitutes a strong self-promoting mechanism in the initiation and progression of  
361 atherosclerosis. We observed a marked TRPM2-mediated intracellular Ca<sup>2+</sup> increase in macrophages induced by  
362 TSP1 or oxLDL. Inhibiting this Ca<sup>2+</sup> signaling by deleting or inhibiting TRPM2 reduces production of ROS, MCP1  
363 and MIP, inhibits oxLDL uptake, suppresses macrophage infiltration and enhances macrophage emigration. This is  
364 the first report demonstrating an important role of TRPM2-mediated Ca<sup>2+</sup> through TRPM2-CD36 axis in  
365 atherosclerosis. Moreover, TRPM2-CD36 mediated Ca<sup>2+</sup> also promotes NLRP3 inflammasome activation and  
366 therefore IL-1 $\beta$  production *in vitro* and *in vivo*, as evidenced that secretion of IL-1 $\beta$  in macrophages induced by  
367 oxLDL or TSP1 was markedly inhibited by *Trpm2* deletion, TRPM2 inhibition or blocking the Ca<sup>2+</sup> release.  
368 Consistent with our results, previous studies have implicated that Ca<sup>2+</sup> is involved in NLRP3 induced inflammasome  
369 activation in cultured macrophages<sup>46,47</sup>. Thus, the TRPM2-CD36 activation loop triggers multiple factors and  
370 signaling pathways in promoting atherosclerosis. Controlling this atherogenic TRPM2-CD36 axis by targeting  
371 TRPM2 provides a promising anti-atherosclerosis strategy.



372 In conclusion, we found that at the animal level, *Trpm2* deletion protected *ApoE*<sup>-/-</sup> mice against HFD induced  
373 atherosclerosis, which was characterized by reduced plaque burden in the aorta. At the tissue level, *Trpm2* deletion  
374 resulted in decreased macrophage burden and suppressed inflammasome activation in the vessel wall. At the cellular  
375 level, deletion of *Trpm2* or inhibiting TRPM2 activation in macrophages suppressed macrophage infiltration,  
376 decreased oxLDL uptake and improved the impaired macrophage emigration. At the molecular level, oxLDL and  
377 TSP1 activated TRPM2 through CD36, and TRPM2 is required for the activation of CD36 signaling cascades in  
378 macrophages by oxLDL or TSP1. Moreover, deleting *Trpm2* or inhibiting TRPM2 activation in macrophages  
379 inhibited oxLDL-or TSP1-induced ROS production and increase of intracellular Ca<sup>2+</sup> concentration. Taken together,  
380 our studies reveal a novel mechanism for understanding the development and progression of atherosclerosis, and  
381 provide a therapeutic strategy that targets on a key player in atherogenesis, TRPM2, for atherogenesis treatment.

382

### 383 **ACKNOWLEDGEMENTS**

384 We thank Dr. Andrew M. Scharenberg (University of Washington) for kindly providing TRPM2 plasmid. This  
385 work was partially supported by the National Institute of Health (R01-HL143750) and American Heart Association  
386 (19TPA34890022) to LY. CD36-bio-His was a gift from Gavin Wright (Addgene plasmid #52025;  
387 <http://n2t.net/addgene:52025>; RRID:Addgene\_52025)<sup>48</sup>.

388

### 389 **AUTHOR CONTRIBUTIONS**

390 L.Y. conceived the research. P.Z. designed and performed in vitro experiments. Z.Y. and J.F. performed most of  
391 the *in vivo* experiments. A.S.Y. conducted some in vitro experiments. P.Z. and L.Y. wrote the manuscript with  
392 contributions from all the authors.

393

## 394 **METHODS**

### 395 **Animals Care**

396 All the experimental mice bred and hosted in the animal facility building of University of Connecticut School  
397 (UCONN Health) were fed with standard chow diet or high-fat diet (HFD) (Harlan, TD.88137), and water ad  
398 libitum. Standard housing conditions were maintained at a controlled temperature with a 12-h light/dark cycle. All  
399 experimental procedures and protocols were approved by the Institutional Animal Care and Use Committee  
400 (IACUC) of University of Connecticut School of Medicine (animal protocol: AP-200135-0723), and were  
401 conducted in accordance with the U.S. National Institutes of Health Guidelines for the Care and Use of Laboratory  
402 Animals.

### 403 **Knockout of TRPM2 (TRPM2-KO)**

404 The global TRPM2 knockout (*Trpm2*<sup>-/-</sup>) mice were generated by Dr. Yasuo Mori's lab at Kyoto University, Japan.  
405 The deletion of *Trpm2* was developed in C57B6J mice by replacing the third exon (S5–S6 linker in the pore domain)  
406 with a neomycin coding region. The knockout mice exhibited no differences in behavior or impairment in breeding,  
407 compared to wild type (WT) C57BL/6 mice. *Trpm2*<sup>-/-</sup> mice were back-crossed to C57BL/6 mice for ≥10 generations  
408 before being used for experiments. *Trpm2*<sup>-/-</sup> mice were crossed with *ApoE*<sup>-/-</sup> mice (JAX laboratory, 002052) to  
409 generate *Trpm2*<sup>-/-</sup> and *ApoE*<sup>-/-</sup> mice. Knockout was confirmed by genotyping. The mice were backcrossed with  
410 C57BL/6 mice for ≥10 generations before being used for experiments.

### 411 **Oil Red O (ORO) staining**

412 Oil Red O (Sigma-Aldrich, O0625) was dissolved in isopropanol at 55 °C for 30 min, and filtered to make a 0.5%  
413 stock solution. 30 min prior to use, ORO stock solution was diluted with water at a 6 : 4 ratio, and filtered to make  
414 the working solution.

415 For *in vivo* aorta staining, mice were euthanized based on our animal protocol, and the full-length aorta was carefully  
416 dissected out. Aortas were washed 3 times using PBS, and fixed in 10% formaldehyde for 30 min at room

417 temperature. Then aortas were washed 3 times using PBS, and stained by ORO working solution for 5 min at room  
418 temperature. After washing 3 times using PBS, the aorta was ready for imaging.

419 For *in vitro* cultured macrophages staining, mature bone-marrow derived macrophages were plated on 25 mm  
420 square coverslips, and treated with oxLDL at a concentration of 50 µg/ml for 24 h. Culture medium was removed  
421 and coverslips were washed 3 times using PBS. Macrophages were fixed in 10% formaldehyde for 10 min at room  
422 temperature, and washed 3 times using PBS. Then macrophages were stained by ORO working solution for 30 s at  
423 room temperature, following a wash using 60% isopropanol for 60 s. After washing 3 times using PBS, the coverslip  
424 was mounted using Prolong® Gold antifade reagent with DAPI.

#### 425 **Antibodies, chemicals and reagents**

426 Rabbit polyclonal antibodies to TRPM2 (Novus, NB110-81601, 1:500 in 5% BSA); Rabbit polyclonal antibodies  
427 to F4/80 (Santa Cruz Biotechnology, sc-377009-594, 1:100 in 10% goat serum and 5% BSA for  
428 immunofluorescence (IF)); Rabbit polyclonal antibodies to CD80 (Santa Cruz Biotechnology, sc-46694-488,  
429 1:1000 in 5% BSA for western blot (WB), 1:100 in 10% goat serum and 5% BSA for IF); Prolong® Gold antifade  
430 reagent with DAPI (Life technologies, P36935); Rabbit polyclonal antibodies to MCP-1 (E8Y7P) (Cell Signaling  
431 Technology, 81559, 1:1000 in 5% BSA); Rabbit polyclonal antibodies to MIF (E7T1W) (Cell Signaling  
432 Technology, 87501, 1:1000 in 5% BSA); Rabbit polyclonal antibodies to CD36 (D8L9T) (Cell Signaling  
433 Technology, 14347S, 1:1000 in 5% BSA); Rabbit polyclonal antibodies to Fyn (Cell Signaling Technology, 4023S,  
434 1:2500 in 5% BSA); Rabbit polyclonal antibodies to Phospho-Src Family (Tyr416) (E6G4R) (Cell Signaling  
435 Technology, 59548S, 1:2500 in 5% BSA); Rabbit polyclonal antibodies to SAPK/JNK (Cell Signaling Technology,  
436 9252S, 1:2500 in 5% BSA for WB); Rabbit polyclonal antibodies to Phospho-SAPK/JNK (Thr183/Tyr185) (81E11)  
437 (Cell Signaling Technology, 4668S, 1:2500 in 5% BSA); Rabbit polyclonal antibodies to p38 MAPK (Cell  
438 Signaling Technology, 9212S, 1:2500 in 5% BSA for WB); Rabbit polyclonal antibodies to Phospho-p38 MAPK  
439 (Thr180/Tyr182) (Cell Signaling Technology, 9211S, 1:2500 in 5% BSA for WB); Rabbit polyclonal antibodies to  
440 iNOS (Santa Cruz Biotechnology, sc-7271, 1:1000 in 5% BSA for WB); Rabbit polyclonal antibodies to GAPDH  
441 (Cell Signaling Technology, 7074S, 1:5000 in 5% BSA for WB); HRP-linked anti-rabbit IgG (1:10000 in 5% BSA

442 for WB. NP40 (Thermal Fisher Scientific, 28324), Triton™ X-100 (T-9284), Bovine Serum Albumin (Sigma-  
443 Aldrich, 9048-46-8), Goat Serum (Thermal Fisher Scientific, 16210-064). Sulfosuccinimidyl Oleate (sodium salt)  
444 (SSO) (Cayman chemical, 11211), N-(p-amylocinnamoyl) Anthranilic Acid (ACA) (Cayman chemical, 14531), PJ-  
445 34 (hydrochloride) (Cayman chemical, 14440), U73122 (Cayman chemical, 70740). Recombinant Human  
446 Thrombospondin-1 Protein, CF (TSP1) (R&D systems, 3074-TH-050), Recombinant Human CCL2/MCP-1  
447 Protein, (MCP-1) (R&D systems, 279-MC-050/CF). All chemicals for making Tyrode solution and recording  
448 solution (see U73122ow) were purchased from Sigma-Aldrich.

#### 449 **Plasmids and enzymes**

450 CD36 (Addgene, 17928). The pcDNA4/TO-FLAG-hTRPM2 construct was a kind gift from Dr. A.M.  
451 Sharenberg(University of Washington, Seattle).

#### 452 **Cell culture and transfection**

453 HEK293T cells were cultured in Dulbecco's Modified Eagle's medium (DMEM) (Thermal Fisher Scientific,  
454 12100-038) supplemented with 10% Bovine Growth Serum (BGS) (HyClone, SH30541.03) and 0.5%  
455 penicillin/streptomycin (Thermal Fisher Scientific, 15140-122) at 37 °C and 5% CO<sub>2</sub>. 8h prior to transfection,  
456 culture medium was replaced with DMEM supplemented only with 2.5% BGS. Cells were transfected when at a  
457 confluence about 80-90% using Lipofectamine® 3000 Transfection Kit (Thermal Fisher Scientific, 2232162) based  
458 on manufacturer's instruction.

#### 459 **Isolation and culture of aorta-derived endothelial cell**

460 Endothelial culture medium was made prior to isolation: DMEM: Nutrient Mixture F-12 (DMEM/F12) (Thermal  
461 Fisher Scientific, 11330) was supplemented with 100 µg/ml Endothelial cell growth supplement from bovine neural  
462 tissue (Sigma, E2759-15MG), 10% Fetal Bovine Serum (FBS) (Thermal Fisher Scientific, A4766) and 0.5%  
463 penicillin/streptomycin (Thermal Fisher Scientific, 15140-122).

464 Wild-type mice were euthanized based on IACUC-approved protocols. Thoracic aorta was quickly dissected out,  
465 and lumen was washed 3 times using ice-cold PBS. Then the lumen of the aorta was filled with collagenase II  
466 (Worthington, 4177) in DMEM/F12 at a concentration of 1 mg/ml with 2 ends ligated, and digested at 37 °C for 30  
467 min. Then the ligations were released, and homogenate in the aorta was centrifuged at 1000 g for 10 min at 4 °C.  
468 The supernatant was carefully removed, and the cell pellet was re-suspended using 20% BSA in DMEM/F12 and  
469 centrifuged at 1000 g for 20 min at 4 °C. Then the supernatant was carefully removed, the cell pellet was re-  
470 suspended with prewarmed endothelial cells culture medium, and cells were plated onto 35 mm culture dishes  
471 precoated with Corning® Collagen I, Rat Tail (Corning, 354236). After 24h, medium was replaced and puromycin  
472 was added with at a concentration 2 µg/ml (Sigma, P8833-25MG). Culture medium was changed every 2 days.  
473 Puromycin was be added in the 1<sup>st</sup> week to inhibit the growth of other non-endothelial cells. After 1 week,  
474 immunofluorescence staining of CD31 was performed to confirm the purity of isolated endothelial cells. Then  
475 endothelial cells were plated onto transwell inserts with 12 µm pore size (Costar, 3403) at a density of  $\sim 5 \times 10^6$   
476 cells/ml. Endothelial cells typically needed 2 ~ 3 days for endothelial cells to completely cover the upper surface of  
477 transwell inserts.

#### 478 **Isolation and culture of bone marrow derived macrophages**

479 Mice were euthanized based on our IACUC-approved protocol, and femurs were quickly removed. Two ends for  
480 femurs were cut using a scissor, and bone marrow was washed out using PBS. The collected bone marrow was  
481 thoroughly resuspended with DMEM: Nutrient Mixture F-12 (DMEM/F12) (Thermal Fisher Scientific, 11330)  
482 supplemented with 25 ng/ml Macrophage Colony-Stimulating Factor from mouse (Sigma, M9170-10UG), 10%  
483 BGS (HyClone, SH30541.03) and 0.5% penicillin/streptomycin (Thermal Fisher Scientific, 15140-122). Culture  
484 medium was changed every 3 days. After culturing for 7 ~ 9 days, macrophages were usable for experiments. For  
485 current recording, Fura-2 and R123 imaging, macrophages were split onto 25 mm square coverslips.

#### 486 **Isolation of peritoneal macrophages**

487 To elicit macrophage exudation, 1 ml of thioglycolate medium (sodium thioglycolate, 0.5 g/L; yeast extract, 5 g/L;  
488 glucose, 5.5 g/L; sodium chloride, 2.5 g/L; L-cystine, 0.5 g/L) was injected intraperitoneally for each mouse. After  
489 4 days, mice were euthanized based on our IACUC-approved protocol. Then abdominal area was sterilized using  
490 70% ethanol, and 8 ml of sterilized ice-cold PBS was injected into the peritoneal cavity to collect peritoneal  
491 macrophages. Collected peritoneal exudate cells in PBS were centrifuged at 800 g for 10 min at 4°C. Then cells  
492 were resuspended in macrophage culture medium and plated on culture dishes at a density of  $\sim 2.5 \times 10^6$  cells/ml.  
493 At 3rd day of isolation, macrophages were subjected to whole-cell TRPM2 current recording.

#### 494 **Treatment of macrophages**

495 SSO was used to specifically inhibit the activation of CD36 by oxLDL or TSP1. ACA, PJ34 and U73122 were used  
496 to inhibit TRPM2 activation by oxLDL or TSP1. SSO, PJ34 and U73122 were dissolved in DMSO at a stock  
497 concentration of 10 mM, and ACA was dissolved in DMSO at a stock concentration of 100 mM. They are all diluted  
498 to a working concentration of 1  $\mu$ M in macrophage culture medium or extracellular working solution. U73122 was  
499 used in combination with  $\text{Ca}^{2+}$  free medium and solution. For cell culture, U73122 was diluted in HBSS medium  
500 supplemented with BGS and penicillin/streptomycin. For current recording, Fura-2 and Rhodamine-123 imaging,  
501 U73122 was diluted in  $\text{Ca}^{2+}$  free Tyrode solution. For protein extraction, the incubation time for all inhibitors was  
502 8 h. For current recording, and Fura-2 and Rhodamine-123 imaging, inhibitors were added into the extracellular  
503 solution to maintain the inhibition.

#### 504 ***In vitro* macrophage infiltration and emigration test**

505 As shown in the graphic illustration in **Figure 2**, macrophage infiltration and emigration across cultured aorta-  
506 derived endothelial cells were examined. Transwell inserts were plated with endothelial cells as described above.  
507 For fluid permeation test,  $\sim 100000$  isolated bone marrow derived macrophages were added into the upper chamber,  
508 and recombinant human MCP1 was added into the lower chamber at a concentration of 50 nM to promote  
509 macrophage infiltration. For the macrophage infiltration test, macrophages were treated with oxLDL at a  
510 concentration of 50  $\mu$ M for 24h. Then  $\sim 100000$  oxLDL preloaded macrophages were added into the upper chamber,

511 and recombinant human MCP1 was added into the lower chamber at a concentration of 50 nM to promote  
512 macrophage emigration.

### 513 **Real-time monitoring of mitochondrial function**

514 Mitochondria function was evaluated using Rhodamine-123 dye quenching as previously reported. Rhodamine-  
515 123 (Rh123, Thermal Fisher Scientific, R302) was dissolved in DMSO to make a stock concentration at 10 mg/ml.  
516 Pre-warmed DMEM/F12 medium was used to dilute Rhodamine-123 to a 20 µg/ml working concentration. Culture  
517 medium was removed and cultured macrophages on the 25 mm coverslip were washed 3 times using prewarmed  
518 PBS, then 2 ml of Rh123 working solution was added. Cells were incubated with Rh123 at 37 °C for 15 min. Then  
519 Rh123 working solution was replaced with culture medium. Cells were incubated in Tyrode solution for at least 10  
520 min to achieve Rh123 equilibration after the transition of culture medium to Tyrode solution before experiments.

521 Fluorescence intensities at 509 nm with excitation at 488nm were collected every 15 s for 30 min using CoolSNAP  
522 HQ2 (Photometrics) and data were analyzed using NIS-Elements (Nikon).

### 523 **Ratio calcium imaging experiments**

524 Changes of intracellular Ca<sup>2+</sup> were measured using ratio Ca<sup>2+</sup> imaging as we describe previously. In brief, Fura-2  
525 AM (Thermal Fisher Scientific, F1221) was dissolved in DMSO to make a stock concentration at 1 mM. Pre-  
526 warmed DMEM/F12 medium was used to dilute Fura-2 AM to a working concentration at 2.5 µM, and 0.02%  
527 Pluronic™ F-127 (Thermal Fisher Scientific, P3000MP) was added to facilitate loading of Fura-2 AM.  
528 Macrophages plated on 25 mm glass coverslips were washed 3 times using pre-warmed PBS, and then incubated  
529 with 2 ml of Fura-2 AM working solution for 30~45 min at 37 °C. Non-incorporated dye was washed away using  
530 HEPES-buffered Saline Solution (HBSS) containing (in mM): 20 HEPES, 10 glucose, 1.2 MgCl<sub>2</sub>, 1.2 KH<sub>2</sub>PO<sub>4</sub>, 4.7  
531 KCl, 140 NaCl and 1.3 Ca<sup>2+</sup> (pH 7.4).

532 Ca<sup>2+</sup> influx was measured by perfusing the cells with Tyrode's solution under different treatments. Ionomycin (Iono)  
533 at 1 µM was applied at the end of the experiment as an internal control. Fluorescence intensities at 510 nm with 340

534 nm and 380 nm excitation were collected at a rate of 1 Hz using CoolSNAP HQ2 (Photometrics) and data were  
535 analyzed using NIS-Elements (Nikon). .

### 536 **Western blotting**

537 NP-40/Triton lysis buffer (10% NP40, 1% Triton™ X-100, 150 mM NaCl, 1 mM EDTA, 50 mM Tris, pH=8.0)  
538 containing proteinase inhibitors and phosphatase inhibitors was used to lyse both cultured cells and frozen aorta  
539 tissue. For cultured macrophages, proteins were extracted 8 h after either oxLDL or treatment with or without  
540 different inhibitors. For tissue, full-length aorta were collected 6 months after HFD treatment. Cell and tissue lysate  
541 were lysed by ultrasound using an ultrasonic cleaner filled with ice-cold water for 30 min. After incubated on ice  
542 for 1 h, lysate was centrifuged at 13000 g for 30 min and supernatant was collected. Protein concentration was  
543 measured using Pierce™ Rapid Gold BCA Protein Assay Kit.

544 50-80 µg of total protein per lane was loaded and separated proteins were transferred to nitrocellulose membranes.  
545 Membranes were blocked with 5% BSA and 2.5% goat serum in Tris buffered saline (TBS, pH=7.4) at room  
546 temperature for 2 h, and incubated with primary antibodies in TBS with 0.05% Tween (TBS-T) at room temperature  
547 for 2 h. Then membranes were incubated with secondary antibodies in TBS-T for 1 h at room temperature before  
548 detection. Blots were developed with ImageQuant LAS 4000 imaging system. Band intensity was quantified using  
549 ImageJ software and normalized with appropriate loading controls.

### 550 **Electrophysiology**

551 Whole cell currents were recorded using an Axopatch 200B amplifier. Data were digitized at 10 or 20 kHz and  
552 digitally filtered offline at 1 kHz. Patch electrodes were pulled from borosilicate glass and fire-polished to a  
553 resistance of ~3 MΩ when filled with internal solutions. Series resistance ( $R_s$ ) was compensated up to 90% to  
554 reduce series resistance errors to <5 mV. Cells in which  $R_s$  was >10 MΩ were discarded <sup>39</sup>.

555 For heterologous expression, transfected HEK-293 cells were identified by GFP fluorescence. TRPM2 current  
556 recording in transfected HEK-293T cells was performed. A fast perfusion system was used to exchange extracellular  
557 solutions and to deliver agonists and antagonists to the cells, with a complete solution exchange achieved in about



558 1–3 s. For recordings using SSO, ACA, PJ34 and U73122, these inhibitors were added into the extracellular  
559 recording solution at the same concentration as used during pre-incubation.

560 Normal Tyrode solution contained (mM): 145 NaCl, 5 KCl, 2 CaCl<sub>2</sub>, 10 HEPES, 10 glucose, osmolarity=290-320  
561 mOsm/Kg, and pH=7.4 was adjusted with NaOH. NMDG-Cl solution contained (mM): 150 NMDG-Cl, 10 HEPES,  
562 10 glucose, osmolarity=290-320 mOsm/Kg, and pH=7.4 was adjusted with NMDG. The internal pipette solution  
563 for whole cell current recordings of TRPM2 contained: 135 mM Cs-methanesulfonate (CsSO<sub>3</sub>CH<sub>3</sub>), 8 mM NaCl,  
564 500 nM CaCl<sub>2</sub>, 5 μM EGTA, and 10 mM HEPES, with pH adjusted to 7.2 with CsOH. Free [Ca<sup>2+</sup>]<sub>i</sub> buffered by  
565 EGTA was about 500 nM calculated using Max chelator<sup>39</sup>. ADPR 1 μM was included in the pipette solution for  
566 all experiments.

### 567 **Immunofluorescence staining**

568 Full length aortas harvested from mice were frozen at -80 °C prior to use, and was mounted in Fisher Healthcare™  
569 Tissue-Plus™ O.C.T. Compound (Thermal Fisher Scientific, 23-730-571) prior to cutting. Aortas were cut into  
570 slices at a thickness of 6 μm, mounted to Superfrost® Plus Microscope Slides (Thermal Fisher Scientific, 12-550-  
571 15), and frozen at -80 °C for future use. Prior to staining, slides were left at room temperature for at least 30 min to  
572 allow for dehydration. Slices were fixed in 10% formaldehyde for 15 min following washing 3 times using PBS,  
573 and were incubated in blocking solution containing 5% BSA, 15% goat serum and 1% Triton X-100 at room  
574 temperature for 2 h. Primary antibodies were diluted as described previously in TBS-T containing 15% goat serum.  
575 Slices were incubated with primary antibodies for at least 12 h at 4 °C following washing 3 times using PBS, and  
576 incubated with secondary antibodies at room temperature for 2 h. Then slices were washed 3 times using PBS,  
577 mounted using Prolong® Gold antifade reagent with DAPI. Slices were kept at 4 °C before imaging.

### 578 **Data analysis**

579 All data are expressed as mean ± SEM. For two groups' comparison, statistical significance was determined using  
580 Student's t-test. For multiple groups, statistical significance was determined using one-way or two-way analysis of  
581 variance (ANOVA), followed by Bonferroni post-test. P<0.05 was considered as significant.

## Figure 1

584

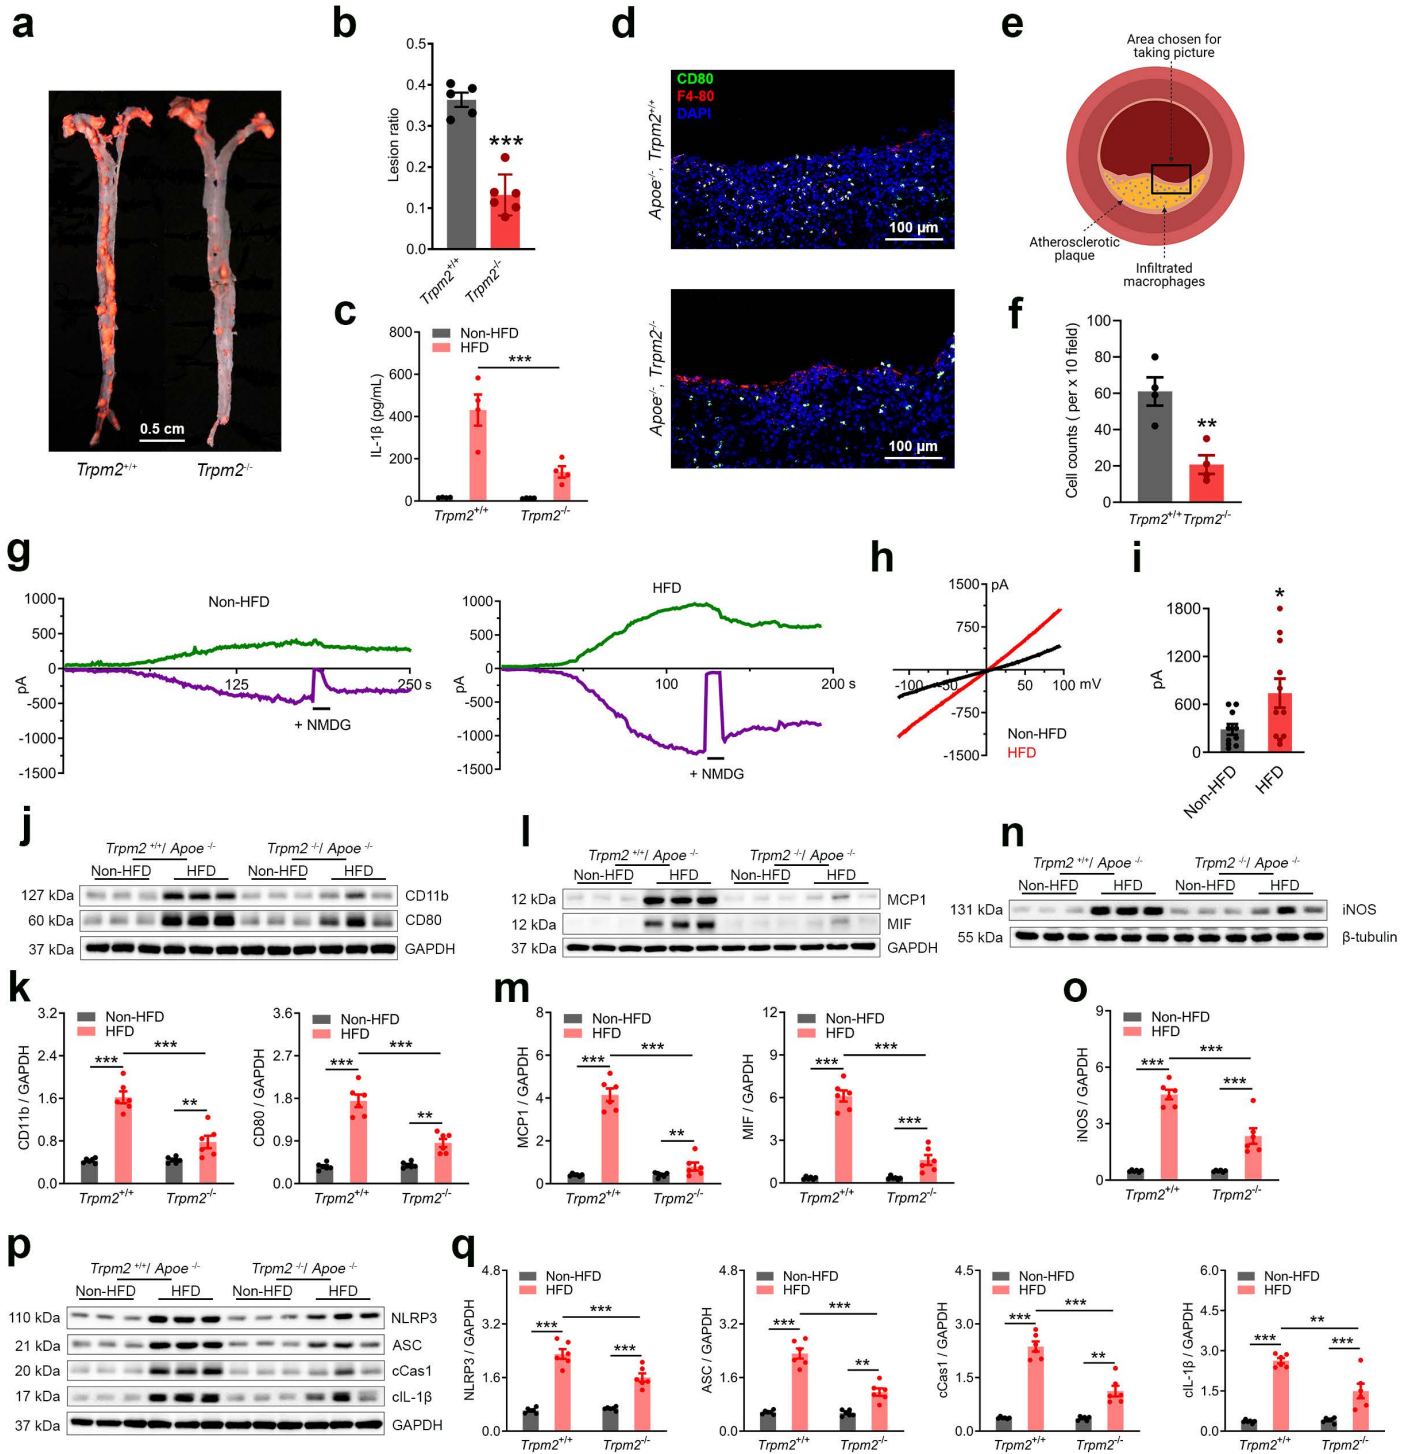

585

### Figure 1: *Trpm2* deletion protects *ApoE*<sup>-/-</sup> mice from high-fat diet induced atherosclerosis.

586

587

588

589

590

(a,b) *Trpm2* deletion (*Trpm2*<sup>-/-</sup>) inhibited the formation of atherosclerotic plaque. **a**, Representative images of Oil Red O (ORO) staining of full-length aorta. **b**, Mean atherosclerotic lesion ratio based on ORO staining from *Trpm2*<sup>+/+</sup> (n=6) and *Trpm2*<sup>-/-</sup> mice (n=5). **(c)** *Trpm2* deletion (*Trpm2*<sup>-/-</sup>) inhibited systemic inflammation. Measurement of IL-1 $\beta$  level in serum from *Trpm2*<sup>+/+</sup> and *Trpm2*<sup>-/-</sup> mice with *ApoE*<sup>-/-</sup> background using ELISA. **(d-f)** *Trpm2* deletion (*Trpm2*<sup>-/-</sup>) reduced macrophage burden in atherosclerotic plaque. **d**, Representative merged images of F4/80 and CD80 staining of aorta sections (Red: F4/80; Blue: DAPI; Green: CD80). **e**, Graphic illustration showing the atherosclerotic area

591 chosen for taking pictures in **d** and **f**. **f**, Quantification of F4/80 and CD80 positive macrophages. 4 mice from each group were chosen for  
592 quantification. (**g-i**) **g**, Representative TRPM2 current traces (Green: outward current at +100 mV; Purple: inward current at +100 mV) in  
593 isolated peritoneal macrophages. NMDG blocks inward current indicating the tightness of seal. **h**, I-V relationship of TRPM2 current. **i**,  
594 Quantification of current amplitude (**j, k**) Representative western blot analysis and quantification of the expression of CD11b and CD80 in  
595 aorta. 6 mice from each group were chosen for quantification. (**l, m**) Representative western blot analysis and quantification of the expression  
596 of MCP1 and MIF in aorta. 6 mice from each group were chosen for quantification. (**n, o**) Representative western blot analysis and  
597 quantification of iNOS expression in aortas. 6 mice from each group were chosen for quantification. (**p, q**) Representative Western blot  
598 analysis and quantification of the expression of NLRP3, ASC, cleaved caspase-1 (cCAS1), and cleaved IL-1 $\beta$  (cIL-1 $\beta$ ) expression in aortas.  
599 6 mice from each group were chosen for quantification. (\*\*:  $p < 0.01$ ; \*\*\*:  $p < 0.001$ ; ANOVA, Bonferroni's test; mean  $\pm$  SEM).

600

## Figure 2

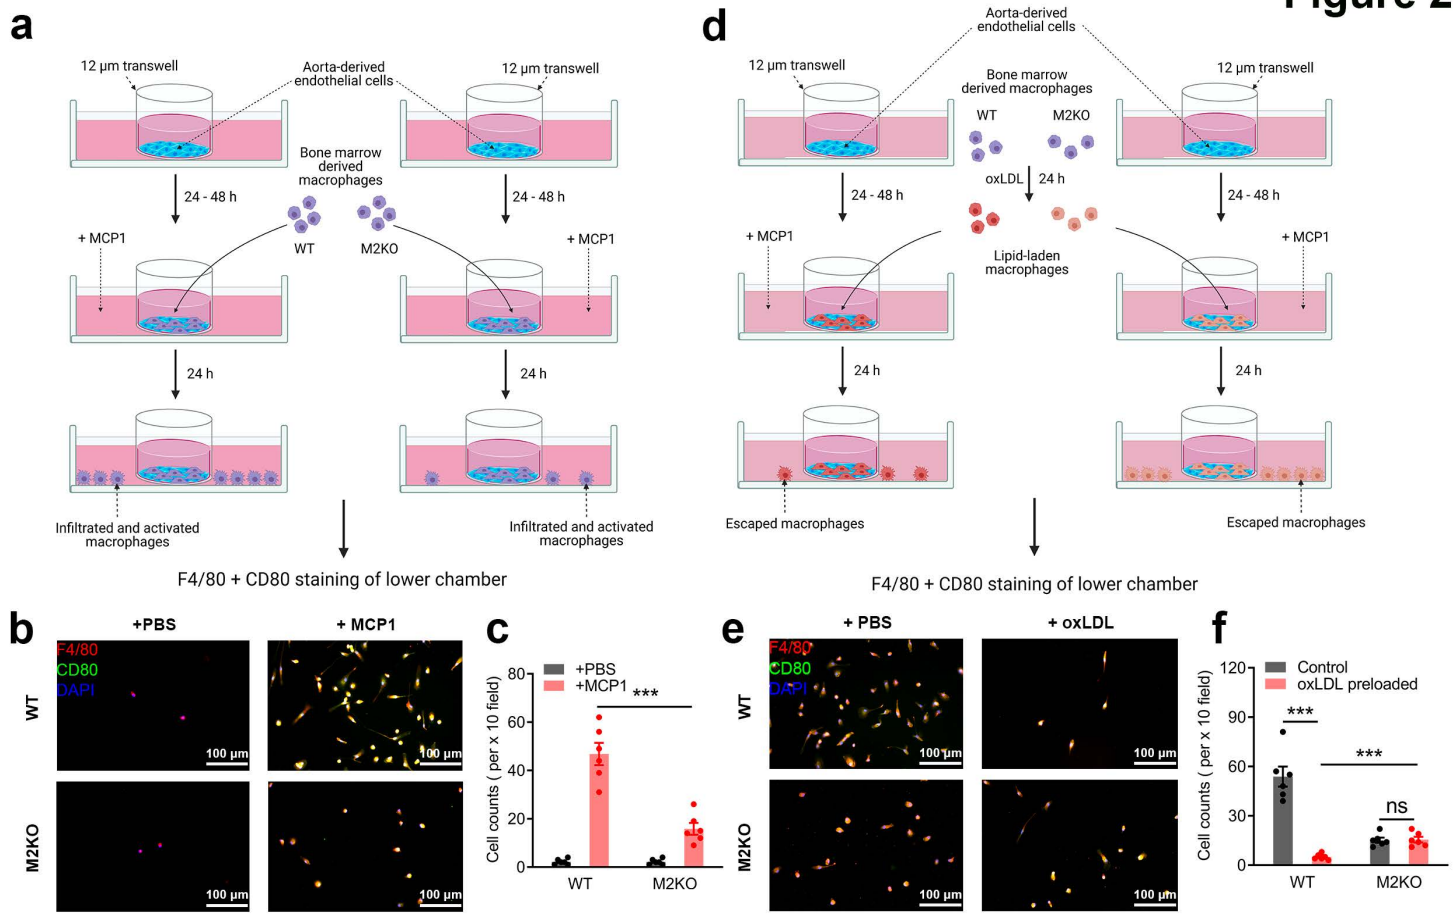

601 **Figure 2: Deletion of *Trpm2* inhibits macrophage infiltration while preserves macrophage emigration.**

602 (a-c) *Trpm2* deletion inhibits macrophage infiltration. a, Graphic illustration of *in vitro* examination of macrophage infiltration across  
 603 endothelial cells induced by MCP1. Aorta-derived endothelial cells were plated on the transwell inserts (pore size: 12  $\mu$ m) for 3-5 days. Bone  
 604 marrow derived macrophages were added into the upper chamber after endothelial cells completely covered the upper surface of transwells.  
 605 After 24 h, F4/80 and CD80 staining of macrophages in the lower chamber was performed as in b (Red: F4/80; Blue: DAPI; Green: CD80).  
 606 c, Quantification of the number of infiltrated macrophages within a x 10 field. 6 dishes from each group were chosen for quantification (d-f)  
 607 *Trpm2* deletion prevented the loss of emigration ability in oxLDL-pre-loaded macrophages. e, Graphic illustration of *in vitro* examination of  
 608 macrophage emigration across endothelial cells induced by MCP1. Aorta-derived endothelial cells were plated on the transwell inserts (pore  
 609 size: 12  $\mu$ m) for 3-5 days. Bone marrow derived macrophages preloaded with oxLDL for 24 h were added into the upper chamber after  
 610 endothelial cells completely covered the upper surface of transwells. After 24 h, F4/80 and CD80 staining of macrophages in lower chamber  
 611 was performed as in e (Red: F4/80; Blue: DAPI; Green: CD80). f, Quantification of the number of infiltrated macrophages with in a x 10  
 612 field. 6 dishes from each group were chosen for quantification. (ns: no statistical significance; \*\*\*:  $p < 0.001$ ; ANOVA, Bonferroni's test;  
 613 mean  $\pm$  SEM).

614

615

## Figure 3

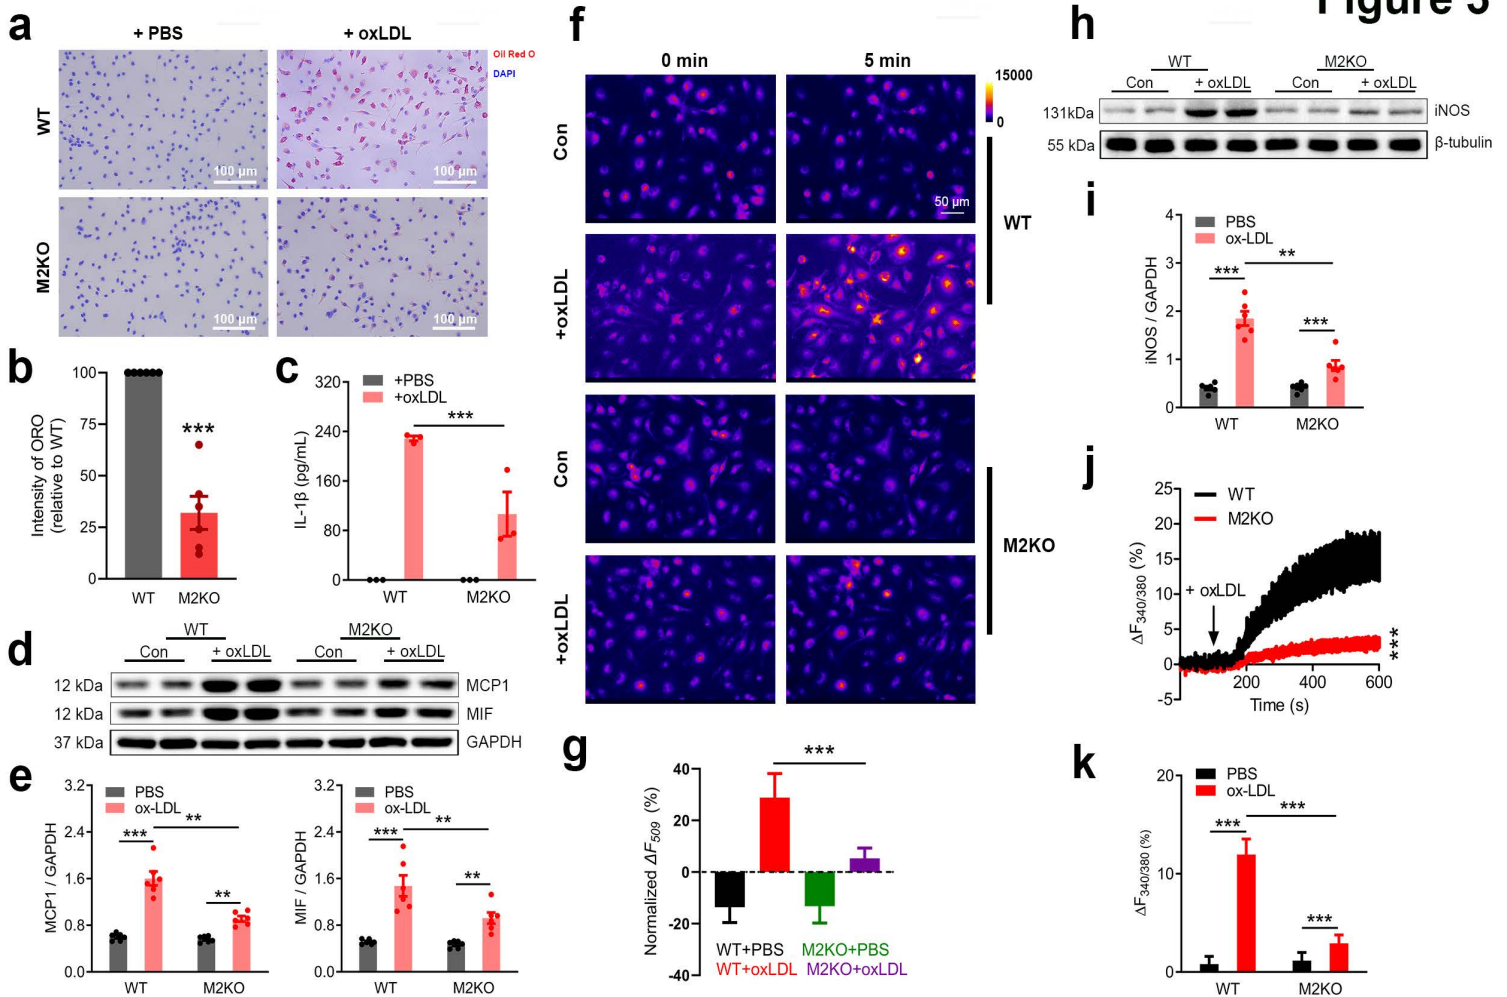

617 **Figure 3: Deletion of *Trpm2* inhibits the uptake of oxLDL and pro-inflammatory activation of macrophages.**

618 (a, b) Representative images and quantification of Oil Red O (ORO) staining in isolated macrophages from wild-type (WT) or *Trpm2*  
619 knockout (M2KO) mice after treatment with oxLDL (50  $\mu$ g/ml) for 24 h. 6 dishes of cells from 6 mice from each group were chosen for  
620 quantification. (c) *Trpm2* deletion inhibited the production of IL-1 $\beta$  in macrophages. Measurement of IL-1 $\beta$  level in culture medium after the  
621 treatment of oxLDL (50  $\mu$ g/ml) for 24 h using ELISA. 3 dishes of cells from 3 mice from each group were chosen for quantification. (d, e)  
622 Representative western blot analysis and quantification of the expression of MCP1 and MIF in isolated macrophages after oxLDL treatment  
623 (50  $\mu$ g/ml) for 24 h. 6 dishes of cells from 6 mice from each group were chosen for quantification. (f, g) f, Representative picture of  
624 Rhodamine-123 real-time imaging before and 5 min after oxLDL treatment (50  $\mu$ g/ml) in isolated macrophages. Control group (PBS  
625 treatment) was used to show the rapid photo bleaching of R123. g, Quantification of changes of R123 fluorescence 5 min after oxLDL  
626 treatment. WT (n=40 for oxLDL treatment, n=38 for control) and M2KO (n=43 for oxLDL treatment, n=40 for control) macrophages were  
627 from 4 dishes of cultured cells isolated from 4 mice in each group. (h, i) Representative Western blot analysis and quantification of the  
628 expression of iNOS in isolated macrophages treated with oxLDL (50  $\mu$ g/ml). 6 dishes of cells from 6 mice from each group were chosen for  
629 quantification (j, k) j, Representative real-time Fura-2 Ca<sup>2+</sup> imaging traces during oxLDL treatment (50  $\mu$ g/ml). The averaged traces were  
630 from 10 macrophages randomly chosen from a representative culture dish for each groups. k, Quantification of Fura-2 fluorescence changes  
631 5 min after oxLDL treatment. WT (n=20 for oxLDL treatment, n=20 for control) and M2KO (n=20 for oxLDL treatment, n=20 for control)  
632 macrophages were from 3 dishes of cultured cells isolated from 3 mice in each group. (\*\*: p < 0.01; \*\*\*: p < 0.001; ANOVA, Bonferroni's  
633 test; mean  $\pm$  SEM).

634

635

636

## Figure 4

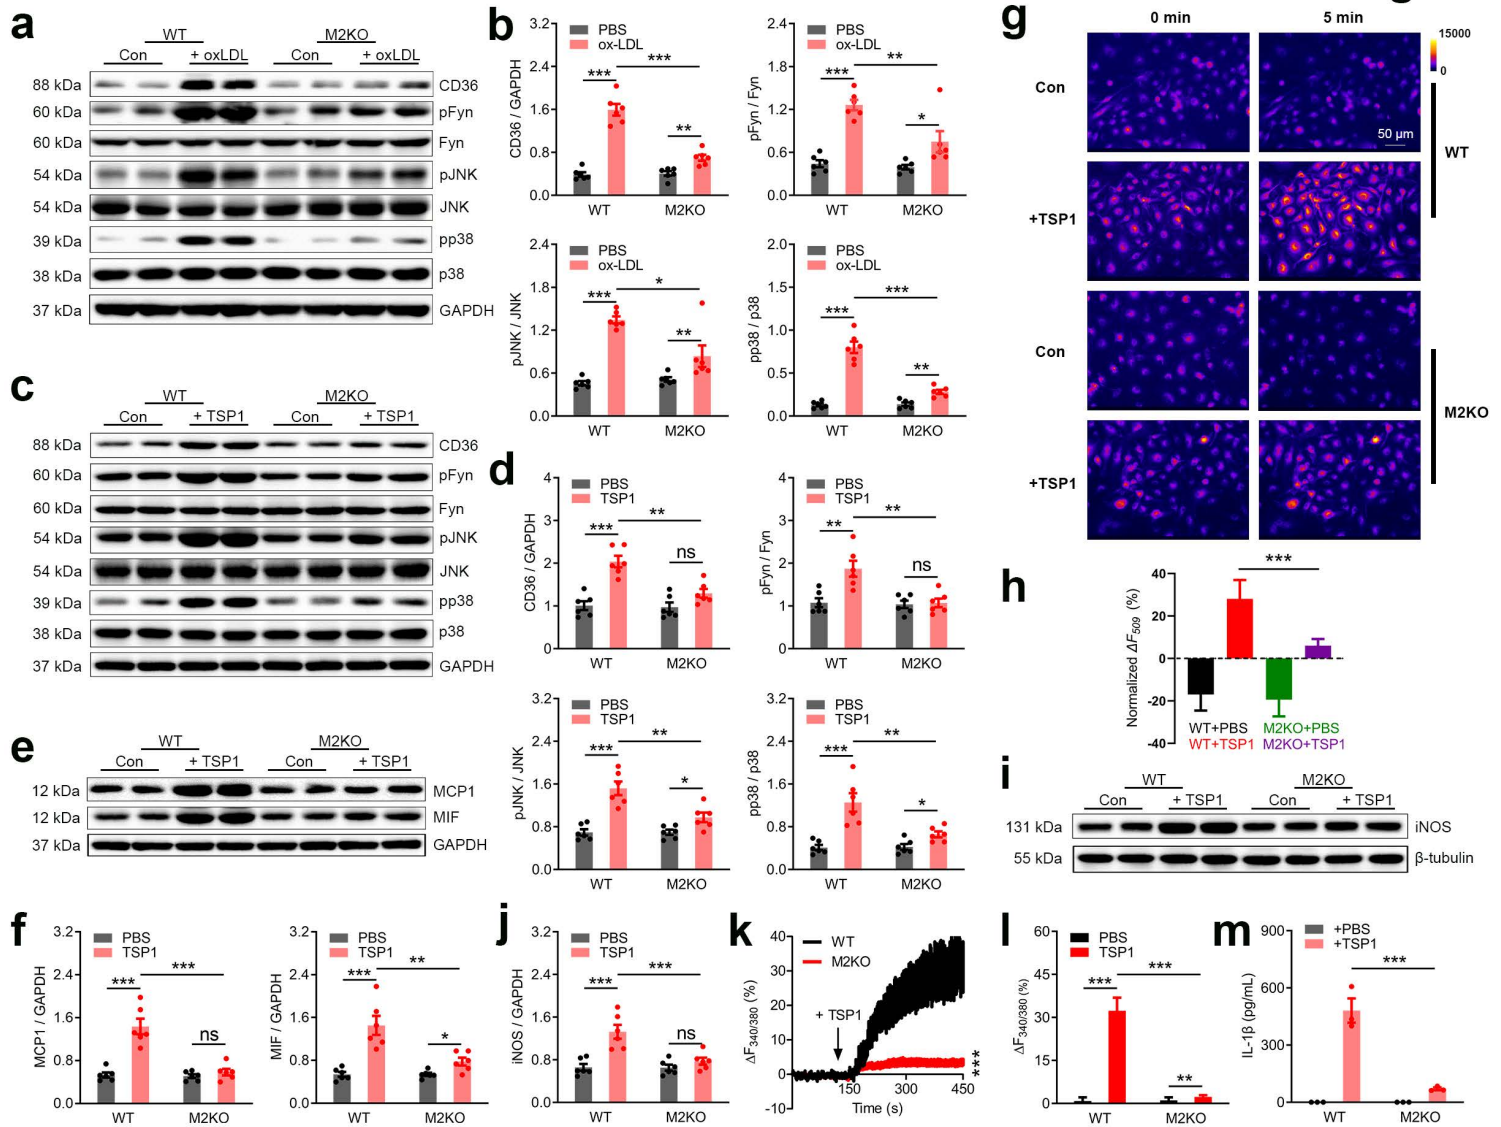

637 **Figure 4: *Trpm2* deletion inhibits the activation of CD36 signaling cascades by oxLDL and TSP1.**

638 (a-d) a, c Representative western blot analysis of CD36, pFyn, Fyn, pJNK, JNK, pp38 and p38 expression in isolated macrophages after  
639 oxLDL (50 μg/ml) or TSP1 (10 μg/ml) treatment. b, d Quantification of western blot bands. 6 dishes of macrophages from 6 mice were used  
640 for protein extraction in each group. (e, f) Representative western blot analysis and quantification of the expression of MCP1 and MIF in  
641 isolated macrophages after treatment with TSP1 (10 μg/ml) for 24 h. 6 dishes of cells from 6 mice from each group were chosen for  
642 quantification. (g, h) g, Representative picture of R123 imaging before and 5 min after TSP1 treatment (10 μg/ml) in isolated macrophages.  
643 Control group (Con: PBS treatment) was used to show the rapid photo bleaching of R123. h, Quantification of changes of R123 fluorescence  
644 5 min after TSP1 treatment. WT (n=45 for TSP1 treatment, n=47 for control) and M2KO (n=43 for TSP1 treatment, n=47 for control)  
645 macrophages were from 4 dishes of cultured cells isolated from 4 mice in each group. (i, j) Representative western blot analysis and  
646 quantification of iNOS expression in isolated macrophages treated with TSP1 (10 μg/ml). 6 dishes of cells from 6 mice from each group  
647 were chosen for quantification. (k), Representative real-time Fura-2 Ca<sup>2+</sup> imaging traces during TSP1 treatment (10 μg/ml). The averaged  
648 traces were from 10 macrophages randomly chosen from a representative culture dish of each group. (l), Quantification of Fura-2 fluorescence  
649 changes 5 min after TSP1 treatment. WT (n=20 for TSP1 treatment, n=20 for control) and M2KO (n=20 for TSP1 treatment, n=20 for control)  
650 macrophages were from 3 dishes of cultured cells isolated from 3 mice in each group. (m) *Trpm2* deletion (M2KO) inhibited the production  
651 of IL-1β in macrophages. Measurement of IL-1β level in culture medium after the treatment of TSP1 (10 μg/ml) for 24 h using ELISA. 3  
652 dishes of cells from 3 mice from each group were chosen for quantification. (ns: no statistical significance; \*: p < 0.05; \*\*: p < 0.01; \*\*\*: p  
653 < 0.001; ANOVA, Bonferroni's test; mean ± SEM).

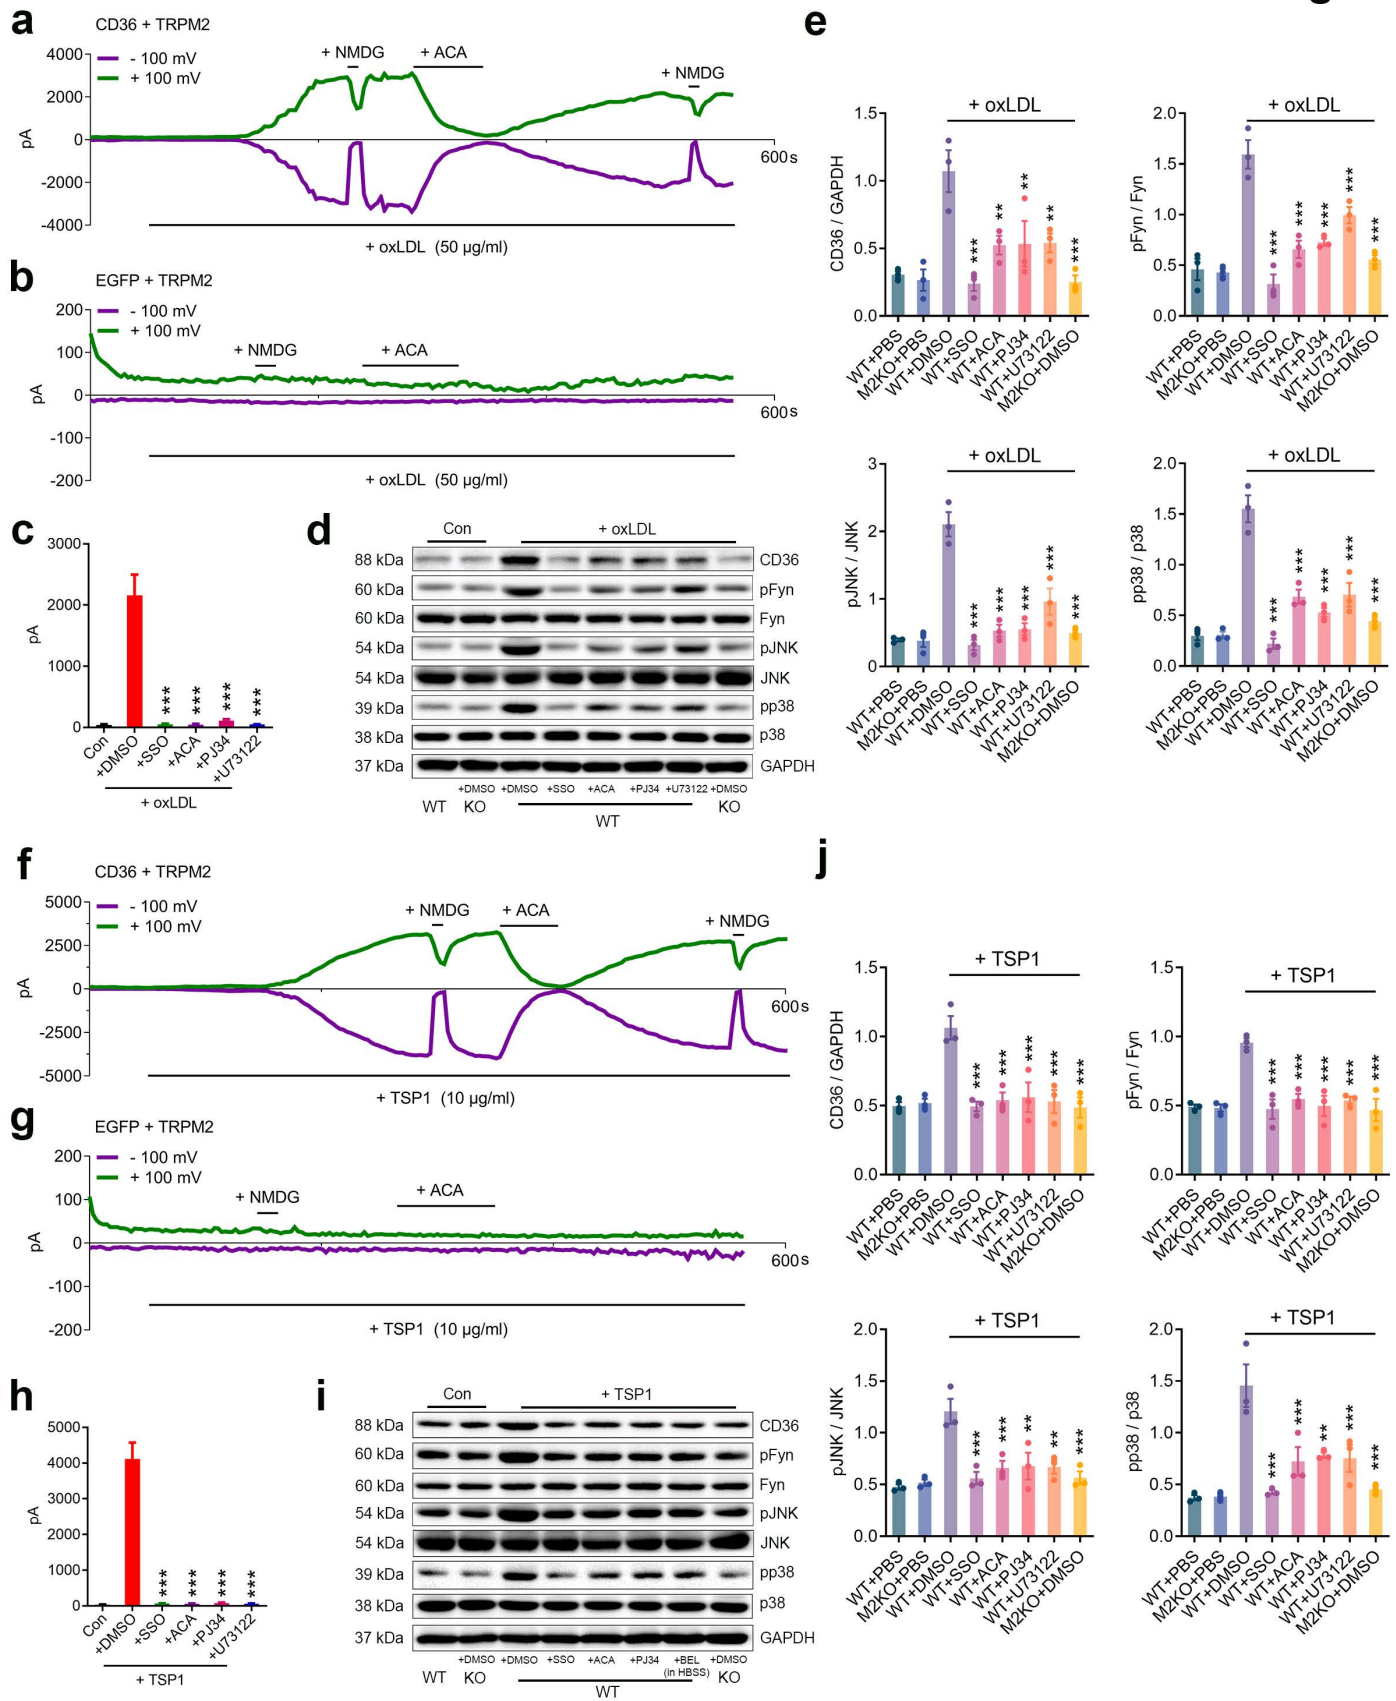

654 **Figure 5: TRPM2 mediates the activation of CD36 signaling cascades in macrophages induced by oxLDL**  
 655 **and TSP1.**

656 (a-c) CD36 is needed for the activation of TRPM2 induced by oxLDL (50  $\mu$ g/ml) in HEK293T cells. **a**, Representative TRPM2 current traces  
657 (Green: outward current at +100 mV; Purple: inward current at -100 mV) in HEK293T cells transfected with CD36 and TRPM2 during  
658 oxLDL treatment. NMDG blocks inward current indicating the tightness of seal. ACA is a TRPM2 blocker. **b**, Representative recording  
659 traces in HEK293T cells transfected with only TRPM2 during oxLDL treatment. **c**, Quantification of TRPM2 current amplitude in HEK293T  
660 cells transfected with CD36 and TRPM2. (**d, e**) Inhibiting the activation of TRPM2 impairs the activation of CD36 signaling cascade induced  
661 by oxLDL (50  $\mu$ g/ml) in macrophages. **d**, Representative western blot analysis of the expression of CD36, pFyn, Fyn, pJNK, JNK, pp38 and  
662 p38 in isolated macrophages from WT (n=3 in each group) and M2KO mice (n=3 in each group). **e**, Quantification of western blot bands. 3  
663 dishes of macrophages were used for protein extraction in each group. (**f-h**) CD36 is needed for the activation of TRPM2 induced by TSP1  
664 (10  $\mu$ g/ml) in HEK293T cells. **f**, Representative TRPM2 current traces (Green: outward current at +100 mV; Purple: inward current at -100  
665 mV) in HEK293T cells transfected with CD36 and TRPM2 during TSP1 treatment. NMDG blocks inward current indicating the tightness of  
666 seal. ACA is a TRPM2 blocker. **g**, Representative recording traces in HEK293T cells transfected with only TRPM2 during TSP1 treatment.  
667 **h**, Quantification of TRPM2 current amplitude in HEK293T cells transfected with CD36 and TRPM2. (**i, j**) Inhibiting the activation of  
668 TRPM2 impairs the activation of CD36 signaling cascade induced by TSP1 (10  $\mu$ g/ml) in macrophages. **i**, Representative Western blot  
669 analysis of the expression of CD36, pFyn, Fyn, pJNK, JNK, pp38 and p38 in isolated macrophages from WT (n=3 in each group) and eM2KO  
670 mice (n=3 in each group). **j**, Quantification of Western blot bands. 3 dishes of macrophages were used for protein extraction in each group.  
671 (\*:  $p < 0.05$ ; \*\*:  $p < 0.01$ ; \*\*\*:  $p < 0.001$ ; ANOVA, Bonferroni's test; mean  $\pm$  SEM).

672



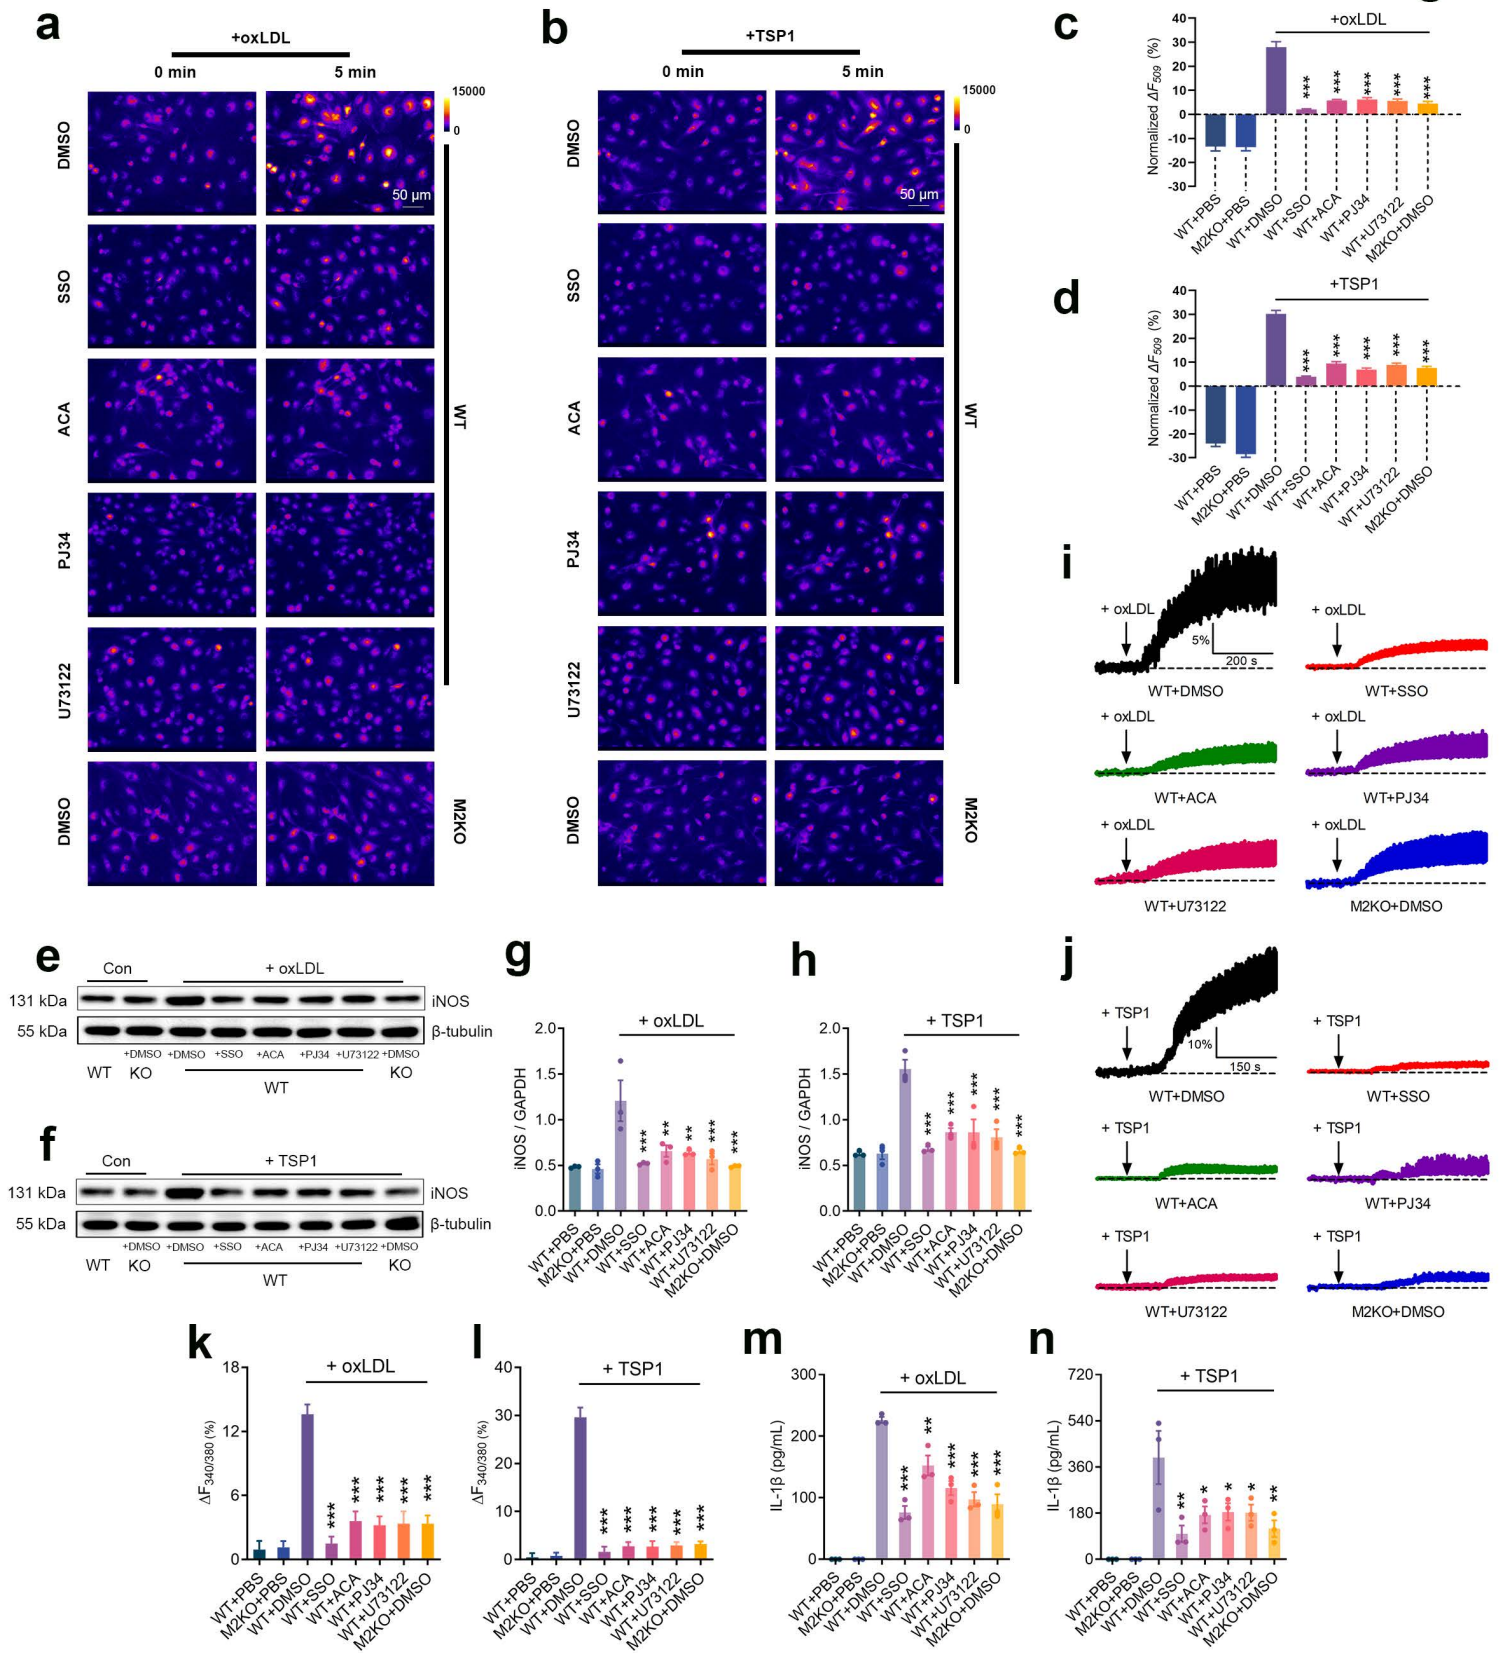

673 **Figure 6: TRPM2 mediates ROS production, increased Ca<sup>2+</sup> concentration and inflammasome activation in**  
 674 **macrophages induced by oxLDL or TSP1.**

675 **(a-d)** Representative picture of Rhodamine-123 real-time imaging of macrophages before and 5 min after oxLDL treatment (50 µg/ml) as in  
676 **a**, and 5 min after TSP1 treatment (10 µg/ml) as in **b** in isolated macrophages. Quantification of changes of R123 fluorescence 5 min after  
677 oxLDL treatment as in **c**, and 5 min after TSP1 treatment as in **d**. For oxLDL treatment, WT (n=40 for PBS, n=38 for DMSO, n=35 for SSO,  
678 n=38 for ACA, n=39 for PJ34, n=44 for U73122 (in HBSS)) and M2KO (n=38 for PBS, n=35 for DMSO) macrophages were from 4 dishes  
679 of cultured cells isolated from 3 mice in each group. For TSP1 treatment, WT (n=48 for PBS, n=50 for DMSO, n=53 for SSO, n=51 for  
680 ACA, n=57 for PJ34, n=56 for U73122 (in HBSS)) and M2KO (n=48 for PBS, n=52 for DMSO) macrophages were from 4 dishes of cultured  
681 cells isolated from 3 mice in each group. **(e-h)** Representative western blot analysis and quantification of the expression of iNOS in isolated  
682 macrophages. 3 dishes of cells from 3 mice from each group were chosen for quantification. **(i-l)** Representative real-time Fura-2 Ca<sup>2+</sup>  
683 imaging traces during oxLDL (50 µg/ml) as in **i**, and during TSP1 treatment (10 µg/ml) as in **j**. The averaged traces were from 10 macrophages  
684 randomly chosen from a representative culture dish of each group. Quantification of Fura-2 fluorescence changes 5 min after oxLDL  
685 treatment as in **k**, and 5 min after TSP1 treatment as in **l**. For oxLDL treatment and TSP1 treatment, 20 macrophages in each group from 3  
686 dishes isolated from 3 mice were chosen for quantification. **(m, n)** Measurement of IL-1β level in culture medium of isolated macrophages  
687 after the treatment of oxLDL (50 µg/ml) or TSP1 (10 µg/ml) for 24 h using ELISA. 3 dishes of cells from 3 mice from each group were  
688 chosen for quantification. (\*: p < 0.05; \*\*: p < 0.01; \*\*\*: p < 0.001; ANOVA, Bonferroni's test; mean ± SEM)

689

690

691

692

693

694

695

696

697

698

699

700

701

702

703

704

705

706

707

708

709

710

711

712

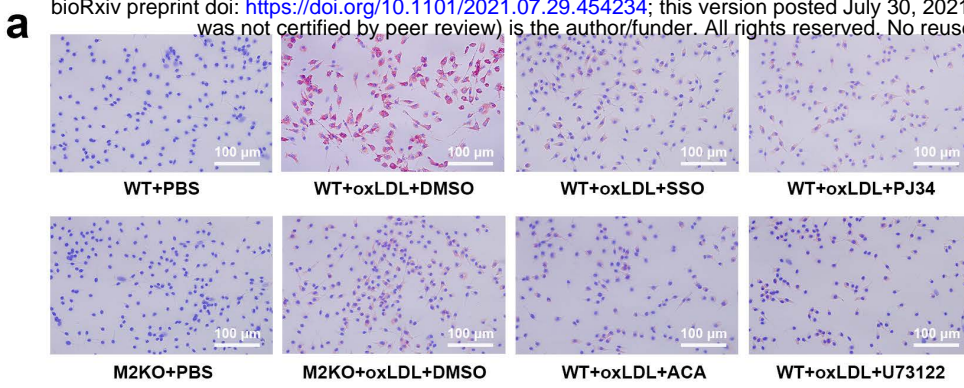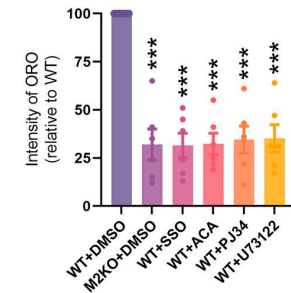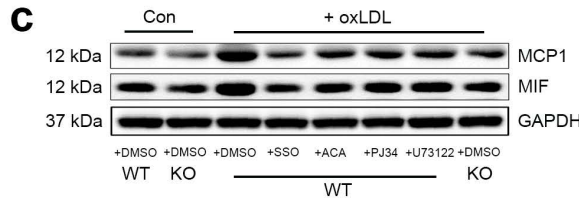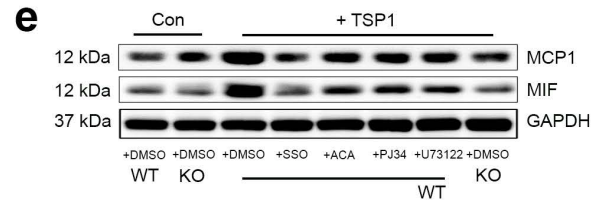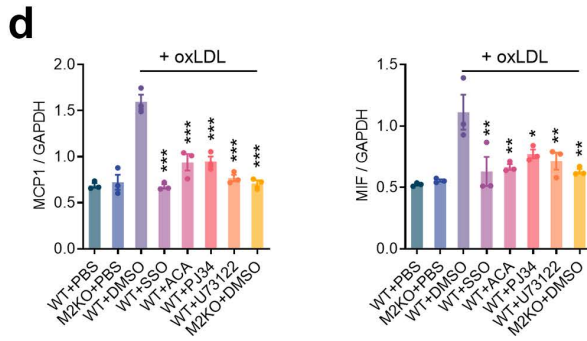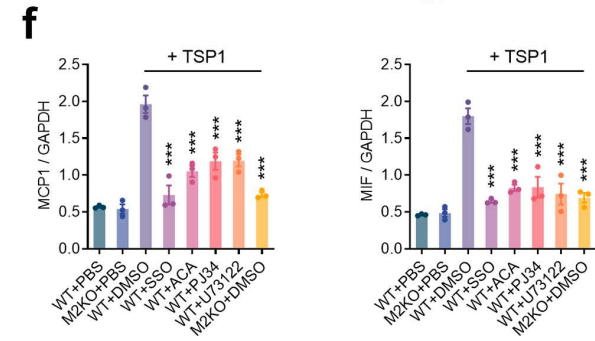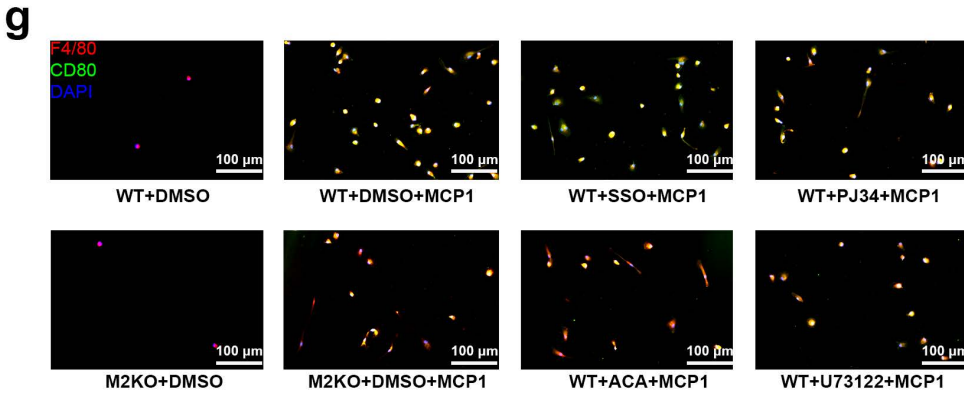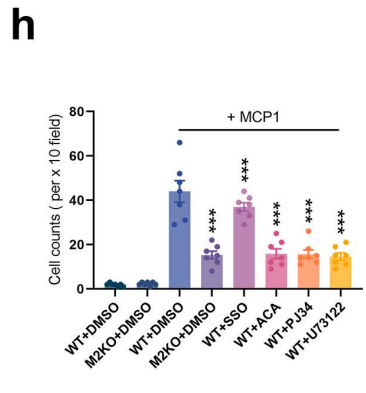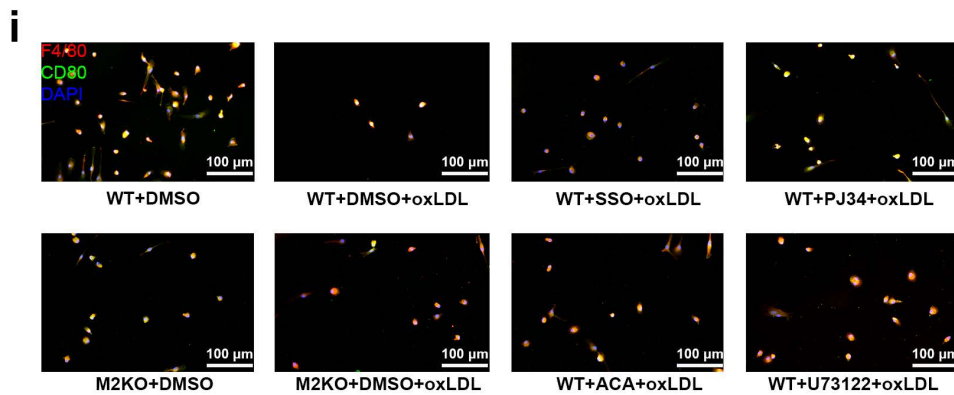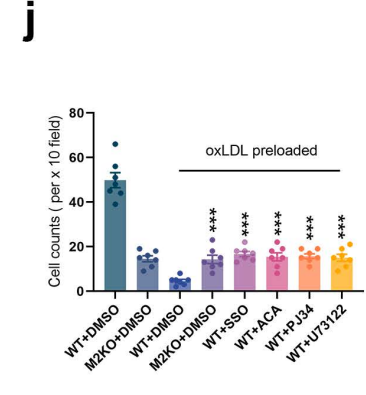

714 **Figure 7: Inhibiting the activation of TRPM2 in macrophages reduces oxLDL uptake, suppresses**  
 715 **macrophage infiltration and improves the impaired macrophage emigration caused by oxLDL.**

716 (a, b) Representative images and quantification of Oil Red O (ORO) staining of isolated macrophages after the treatment with oxLDL (50  
717  $\mu\text{g/ml}$ ) for 24 h. 3 dishes of cells from 3 mice from each group were chosen for quantification. (c-f) Representative Western blot analysis and  
718 quantification of the expression of MCP1 and MIF in isolated macrophages treated with oxLDL (50  $\mu\text{g/ml}$ ) or TSP1 (10  $\mu\text{g/ml}$ ) for 24 h. 3  
719 dishes of cells from 3 mice from each group were chosen for quantification. (g, h) Inhibiting the activation of TRPM2 suppressed macrophage  
720 infiltration. *in vitro* macrophage infiltration test was performed as graphic illustration in **Figure 2a** (Red: F4/80; Blue: DAPI; Green: CD80).  
721 h, Quantification of the number of infiltrated macrophages within a x 10 field. 6 dishes from each group were chosen for quantification. (i,  
722 j) Inhibiting TRPM2 activation prevented the loss of emigration ability in oxLDL-pre-loaded macrophages. *in vitro* macrophage emigration  
723 test was performed as graphic illustration in **Figure 2d**. Macrophage emigration across endothelial cells induced by MCP1. Aorta-derived  
724 endothelial cells were plated on the transwell inserts (pore size: 12  $\mu\text{m}$ ) for 2-3 days. Bone marrow derived macrophages preloaded with  
725 oxLDL for 24 h were added into the upper chamber after endothelial cells completely covered the upper surface of transwells. After 24 h,  
726 F4/80 and CD80 staining of macrophages in lower chamber was performed as in **i** (Red: F4/80; Blue: DAPI; Green: CD80). **j**, Quantification  
727 of the number of infiltrated macrophages within a x 10 field. 6 dishes from each group were chosen for quantification. (ns: no statistical  
728 significance; \*:  $p < 0.05$ ; \*\*:  $p < 0.01$ ; \*\*\*:  $p < 0.001$ ; ANOVA, Bonferroni's test; mean  $\pm$  SEM).

729

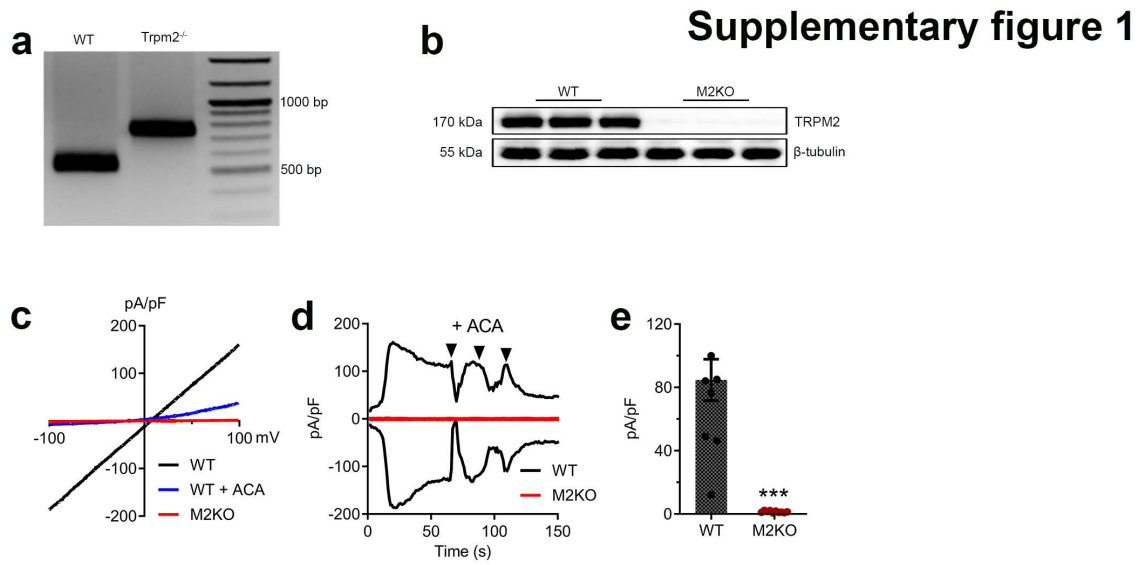

730 **Supplementary Figure 1: Knockout of *Trpm2* in *ApoE*<sup>-/-</sup> mice.**

731 (a) Representative PCR genotyping results showing a 514bp and 740 bp products for WT and M2KO mice. (b) Representative Western blot  
732 analysis of TRPM2 expression in macrophages isolated from *ApoE* single knockout (WT (n=3)) and *ApoE* / *Trpm2* double knockout (M2KO  
733 (n=3)) mice (c-e) Representative recording (c, I-V curve; d, time-current trace) and quantification of TRPM2 current in macrophages isolated  
734 from *ApoE* single knockout (WT) and *ApoE* / *Trpm2* double knockout (M2KO) mice. ACA is a TRPM2 blocker. (\*\*\*: p < 0.001; unpaired t  
735 test; mean  $\pm$  SEM)

736

737

## Supplementary figure 2

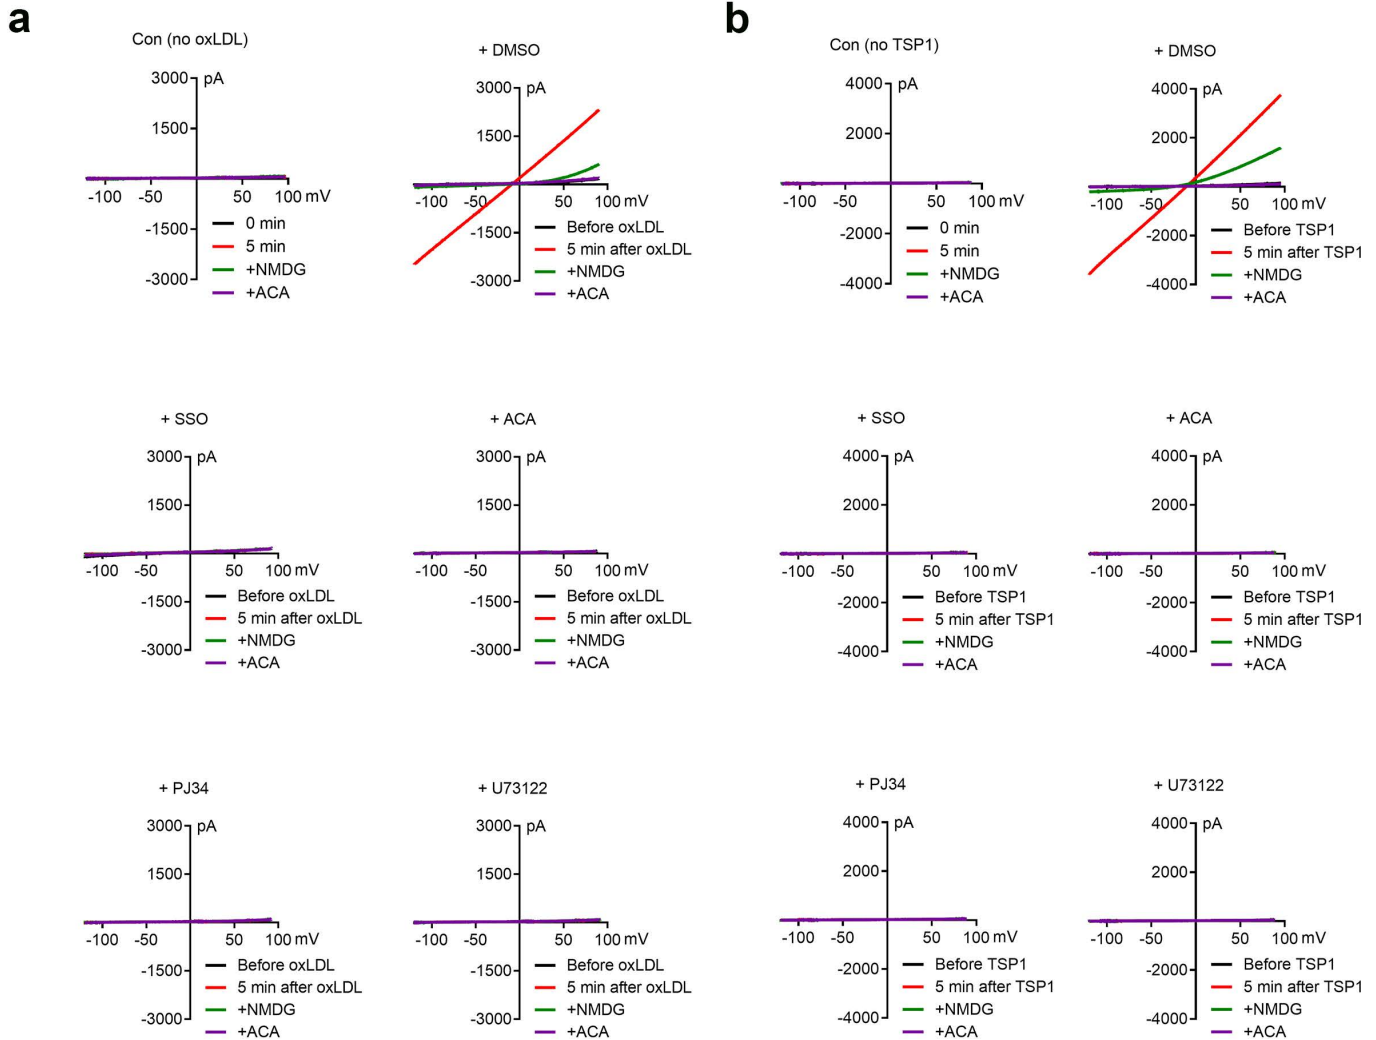

738

739 **Supplementary Figure 2: Different inhibitors suppressed the activation of TRPM2 by oxLDL or TSP1**  
740 **treatment.**

741 (a, b) Representative recording of TRPM2 current in HEK293T cells transfected with CD36 and TRPM2 during oxLDL treatment (50 µg/ml)  
742 as in a, and during TSP1 treatment (10 µg/ml) as in b. Transfected cells were treated with different inhibitors as indicated before current  
743 recording.

## Supplementary figure 3

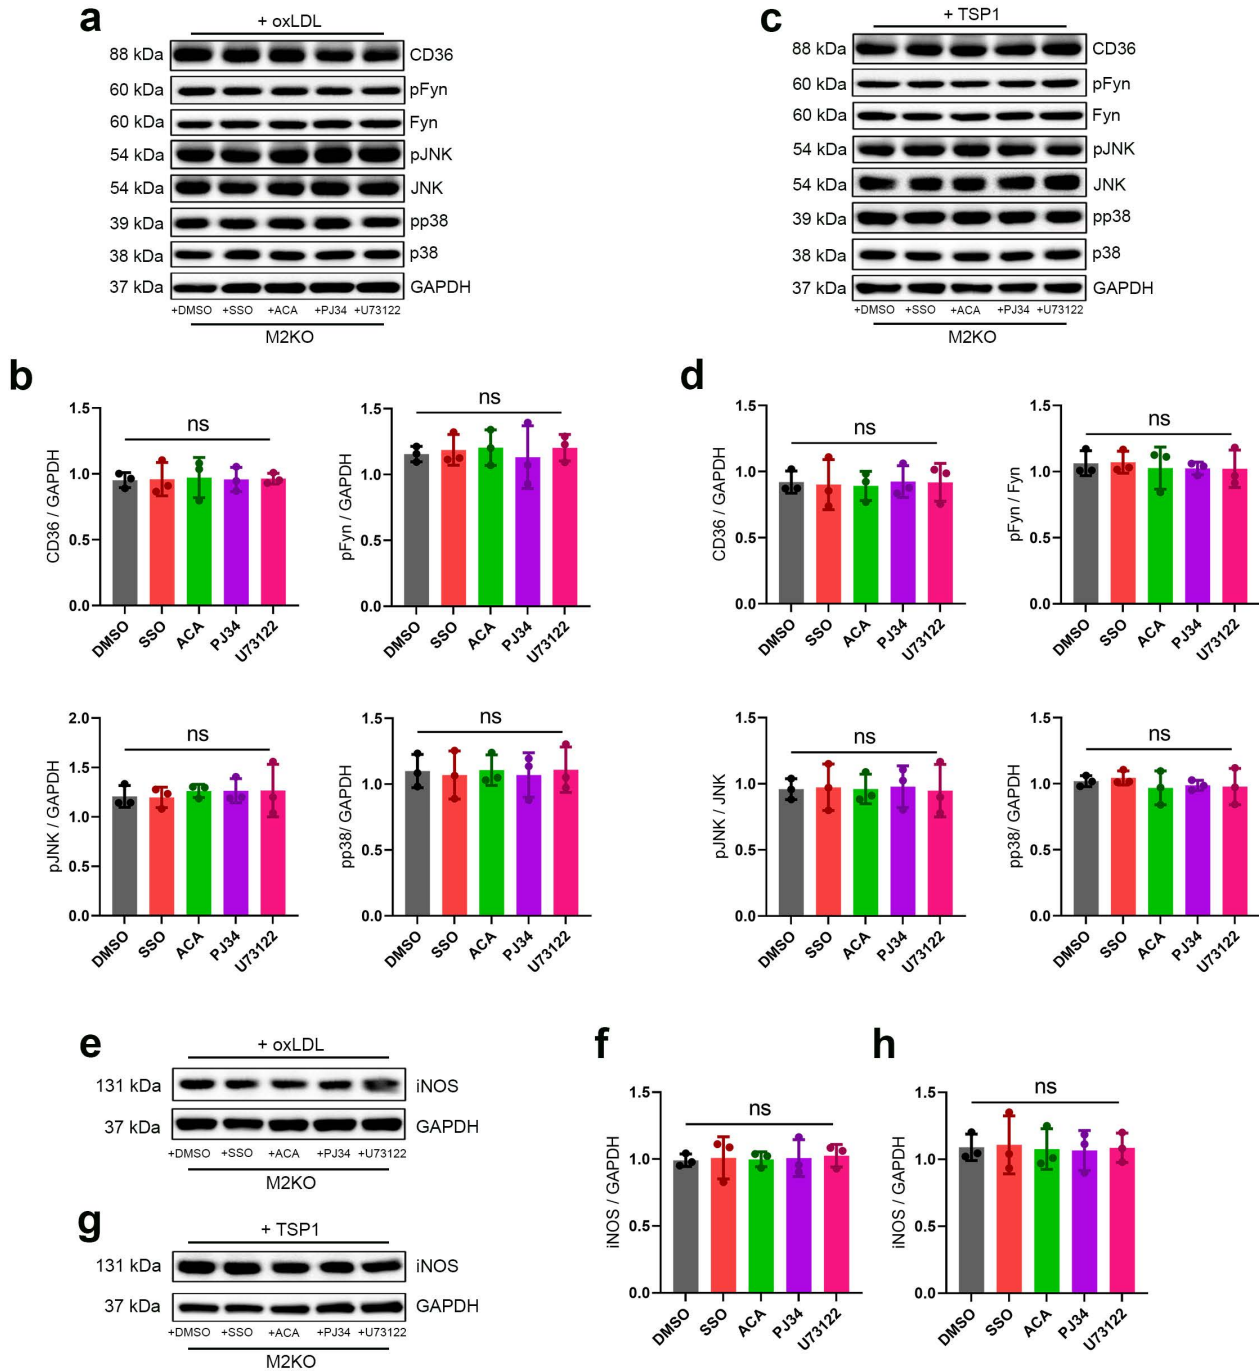

744 **Supplementary Figure 3: Inhibition of CD36 or TRPM2 did not produce additional inhibitory effect on the**  
 745 **activation of CD36 signaling cascade in M2KO macrophages after the treatment of OGD or TSP1.**

746 (a) Representative Western blot analysis of the expression of CD36, pFyn, Fyn, pJNK, JNK, pp38 and p38 in isolated macrophages from  
 747 M2KO mice after oxLDL treatment (50 µg/ml). Macrophages were treated with different inhibitors as indicated before protein extraction.  
 748 (b) Quantification of Western blot bands. GAPDH was used for normalization of CD36, Fyn was used for normalization of pFyn, JNK was  
 749 used for normalization of pJNK, and p38 was used for normalization of pp38. 3 dishes of endothelial cells were used for protein extraction  
 750 in each group (ns: no statistical significance; mean ± SEM). (c) Representative Western blot analysis of the expression of CD36, pFyn, Fyn,  
 751 pJNK, JNK, pp38 and p38 in isolated macrophages from M2KO mice after TSP1 treatment (10 µg/ml). Macrophages were treated with  
 752 different inhibitors as indicated before protein extraction. (d) Quantification of Western blot bands. GAPDH was used for normalization of

753 CD36, Fyn was used for normalization of pFyn, JNK was used for normalization of pJNK, and p38 was used for normalization of pp38. 3  
754 dishes of endothelial cells were used for protein extraction in each group (ns: no statistical significance; mean  $\pm$  SEM). (e) Representative  
755 Western blot analysis of the expression of iNOS in isolated macrophages from M2KO mice after oxLDL treatment (50  $\mu$ g/ml). Macrophages  
756 were treated with different inhibitors as indicated before protein extraction. (f) Quantification of Western blot bands.  $\beta$ -tubulin was used for  
757 normalization of iNOS (ns: no statistical significance; mean  $\pm$  SEM). (e) Representative Western blot analysis of the expression of iNOS in  
758 isolated macrophages from M2KO mice after TSP1 treatment (10  $\mu$ g/ml). Macrophages were treated with different inhibitors as indicated  
759 before protein extraction. (f) Quantification of Western blot bands.  $\beta$ -tubulin was used for normalization of iNOS (ns: no statistical  
760 significance; mean  $\pm$  SEM).

761

762



763

## Supplementary figure 4

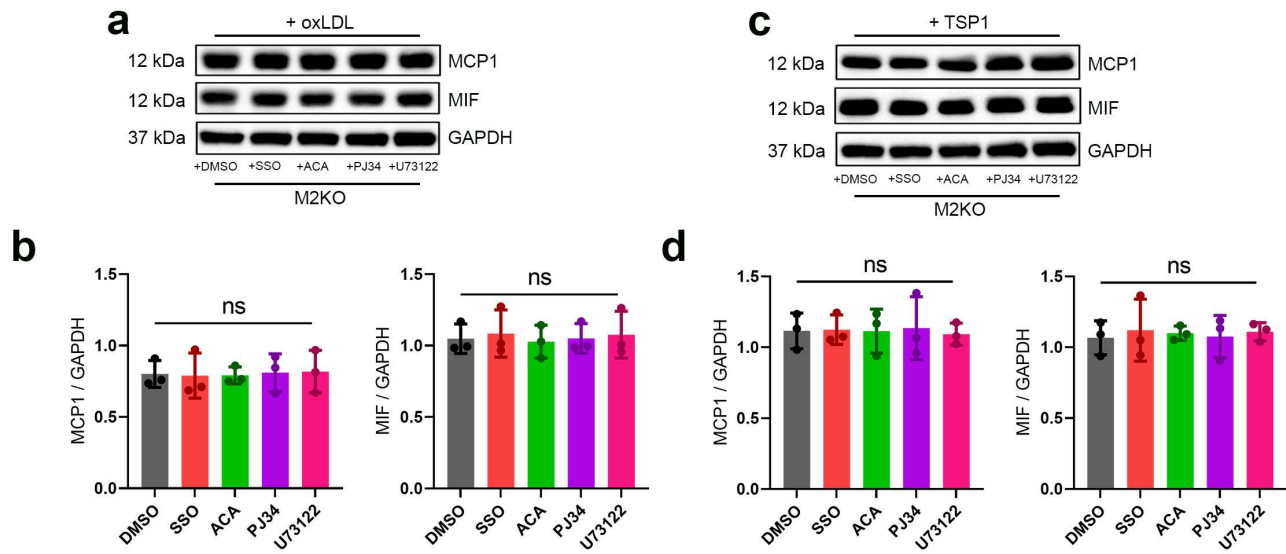

764

765

### 766 **Supplementary Figure 4: Inhibition of CD36 or TRPM2 did not further inhibit the expression of MCP1 and** 767 **MIF after the treatment of OGD or TSP1.**

768 (a) Representative Western blot analysis of the expression of MCP1 and MIF in isolated macrophages from M2KO mice after oxLDL  
769 treatment (50 µg/ml). Macrophages were treated with different inhibitors as indicated before protein extraction. (b) Quantification of Western  
770 blot bands. GAPDH was used for normalization of iNOS (ns: no statistical significance; mean ± SEM). (c) Representative Western blot  
771 analysis of the expression of MCP1 and MIF in isolated macrophages from M2KO mice after TSP1 treatment (10 µg/ml). Macrophages were  
772 treated with different inhibitors as indicated before protein extraction. (d) Quantification of Western blot bands. GAPDH was used for  
773 normalization of iNOS (ns: no statistical significance; mean ± SEM).

774

775

776

777

778

779

## 780 References

- 781 1 Libby, P. *et al.* Atherosclerosis. *Nat Rev Dis Primers* **5**, 56, doi:10.1038/s41572-019-0106-z (2019).
- 782 2 Moore, K. J., Sheedy, F. J. & Fisher, E. A. Macrophages in atherosclerosis: a dynamic balance. *Nat Rev*  
783 *Immunol* **13**, 709-721, doi:10.1038/nri3520 (2013).
- 784 3 Moore, K. J. & Tabas, I. Macrophages in the pathogenesis of atherosclerosis. *Cell* **145**, 341-355,  
785 doi:10.1016/j.cell.2011.04.005 (2011).
- 786 4 Silverstein, R. L., Li, W., Park, Y. M. & Rahaman, S. O. Mechanisms of cell signaling by the scavenger  
787 receptor CD36: implications in atherosclerosis and thrombosis. *Trans Am Clin Climatol Assoc* **121**, 206-  
788 220 (2010).
- 789 5 Moore, K. J. & Freeman, M. W. Scavenger receptors in atherosclerosis: beyond lipid uptake. *Arterioscler*  
790 *Thromb Vasc Biol* **26**, 1702-1711, doi:10.1161/01.ATV.0000229218.97976.43 (2006).
- 791 6 Baldridge, M., Mallat, Z. & Li, X. NLRP3 inflammasome pathways in atherosclerosis. *Atherosclerosis*  
792 **267**, 127-138, doi:10.1016/j.atherosclerosis.2017.10.027 (2017).
- 793 7 Cho, S. CD36 as a therapeutic target for endothelial dysfunction in stroke. *Curr Pharm Des* **18**, 3721-  
794 3730, doi:10.2174/138161212802002760 (2012).
- 795 8 Hara, Y. *et al.* LTRPC2 Ca<sup>2+</sup>-permeable channel activated by changes in redox status confers  
796 susceptibility to cell death. *Molecular cell* **9**, 163-173. (2002).
- 797 9 Perraud, A. L. *et al.* ADP-ribose gating of the calcium-permeable LTRPC2 channel revealed by Nudix  
798 motif homology. *Nature* **411**, 595-599. (2001).
- 799 10 Sano, Y. *et al.* Immunocyte Ca<sup>2+</sup> influx system mediated by LTRPC2. *Science* **293**, 1327-1330 (2001).
- 800 11 Takahashi, N., Kozai, D., Kobayashi, R., Ebert, M. & Mori, Y. Roles of TRPM2 in oxidative stress. *Cell*  
801 *Calcium* **50**, 279-287, doi:10.1016/j.ceca.2011.04.006 (2011).
- 802 12 Desai, B. N. & Leitinger, N. Purinergic and calcium signaling in macrophage function and plasticity.  
803 *Front Immunol* **5**, 580, doi:10.3389/fimmu.2014.00580 (2014).
- 804 13 Syed Mortadza, S. A., Wang, L., Li, D. & Jiang, L. H. TRPM2 Channel-Mediated ROS-Sensitive Ca(2+)  
805 Signaling Mechanisms in Immune Cells. *Frontiers in immunology* **6**, 407,  
806 doi:10.3389/fimmu.2015.00407 (2015).
- 807 14 Di, A. *et al.* The redox-sensitive cation channel TRPM2 modulates phagocyte ROS production and  
808 inflammation. *Nat Immunol* **13**, 29-34, doi:10.1038/ni.2171 (2011).
- 809 15 Wolf, D. & Ley, K. Immunity and Inflammation in Atherosclerosis. *Circ Res* **124**, 315-327,  
810 doi:10.1161/CIRCRESAHA.118.313591 (2019).
- 811 16 Arida, A., Protogerou, A. D., Kitas, G. D. & Sfrikakis, P. P. Systemic Inflammatory Response and  
812 Atherosclerosis: The Paradigm of Chronic Inflammatory Rheumatic Diseases. *Int J Mol Sci* **19**,  
813 doi:10.3390/ijms19071890 (2018).
- 814 17 Deshmane, S. L., Kremlev, S., Amini, S. & Sawaya, B. E. Monocyte chemoattractant protein-1 (MCP-1):  
815 an overview. *J Interferon Cytokine Res* **29**, 313-326, doi:10.1089/jir.2008.0027 (2009).
- 816 18 Zerneck, A., Bernhagen, J. & Weber, C. Macrophage migration inhibitory factor in cardiovascular  
817 disease. *Circulation* **117**, 1594-1602, doi:10.1161/CIRCULATIONAHA.107.729125 (2008).
- 818 19 Barrett, T. J. Macrophages in Atherosclerosis Regression. *Arterioscler Thromb Vasc Biol* **40**, 20-33,  
819 doi:10.1161/ATVBAHA.119.312802 (2020).
- 820 20 Lin, J., Kakkar, V. & Lu, X. Impact of MCP-1 in atherosclerosis. *Curr Pharm Des* **20**, 4580-4588,  
821 doi:10.2174/1381612820666140522115801 (2014).
- 822 21 Calandra, T. & Roger, T. Macrophage migration inhibitory factor: a regulator of innate immunity. *Nat*  
823 *Rev Immunol* **3**, 791-800, doi:10.1038/nri1200 (2003).
- 824 22 Buttery, L. D. *et al.* Inducible nitric oxide synthase is present within human atherosclerotic lesions and  
825 promotes the formation and activity of peroxynitrite. *Lab Invest* **75**, 77-85 (1996).
- 826 23 Nowak, W. N., Deng, J., Ruan, X. Z. & Xu, Q. Reactive Oxygen Species Generation and Atherosclerosis.  
827 *Arterioscler Thromb Vasc Biol* **37**, e41-e52, doi:10.1161/ATVBAHA.117.309228 (2017).
- 828 24 Duewell, P. *et al.* NLRP3 inflammasomes are required for atherogenesis and activated by cholesterol  
829 crystals. *Nature* **464**, 1357-1361, doi:10.1038/nature08938 (2010).

- 830 25 Park, Y. M., Febbraio, M. & Silverstein, R. L. CD36 modulates migration of mouse and human  
831 macrophages in response to oxidized LDL and may contribute to macrophage trapping in the arterial  
832 intima. *J Clin Invest* **119**, 136-145, doi:10.1172/JCI35535 (2009).
- 833 26 Xu, S. *et al.* Evaluation of foam cell formation in cultured macrophages: an improved method with Oil  
834 Red O staining and DiI-oxLDL uptake. *Cytotechnology* **62**, 473-481, doi:10.1007/s10616-010-9290-0  
835 (2010).
- 836 27 Wang, Y., Wang, G. Z., Rabinovitch, P. S. & Tabas, I. Macrophage mitochondrial oxidative stress  
837 promotes atherosclerosis and nuclear factor-kappaB-mediated inflammation in macrophages. *Circ Res*  
838 **114**, 421-433, doi:10.1161/CIRCRESAHA.114.302153 (2014).
- 839 28 Yan, J., Bengtson, C. P., Buchthal, B., Hagenston, A. M. & Bading, H. Coupling of NMDA receptors and  
840 TRPM4 guides discovery of unconventional neuroprotectants. *Science* **370**, doi:10.1126/science.aay3302  
841 (2020).
- 842 29 Dugan, L. L. *et al.* Mitochondrial production of reactive oxygen species in cortical neurons following  
843 exposure to N-methyl-D-aspartate. *J Neurosci* **15**, 6377-6388 (1995).
- 844 30 Hoffmann, A., Kann, O., Ohlemeyer, C., Hanisch, U. K. & Kettenmann, H. Elevation of basal  
845 intracellular calcium as a central element in the activation of brain macrophages (microglia): suppression  
846 of receptor-evoked calcium signaling and control of release function. *J Neurosci* **23**, 4410-4419 (2003).
- 847 31 Zhao, M. *et al.* Activation of the p38 MAP kinase pathway is required for foam cell formation from  
848 macrophages exposed to oxidized LDL. *APMIS : acta pathologica, microbiologica, et immunologica*  
849 *Scandinavica* **110**, 458-468, doi:10.1034/j.1600-0463.2002.100604.x (2002).
- 850 32 Ricci, R. *et al.* Requirement of JNK2 for scavenger receptor A-mediated foam cell formation in  
851 atherogenesis. *Science* **306**, 1558-1561, doi:10.1126/science.1101909 (2004).
- 852 33 Rahaman, S. O. *et al.* A CD36-dependent signaling cascade is necessary for macrophage foam cell  
853 formation. *Cell metabolism* **4**, 211-221, doi:10.1016/j.cmet.2006.06.007 (2006).
- 854 34 Chu, L. Y., Ramakrishnan, D. P. & Silverstein, R. L. Thrombospondin-1 modulates VEGF signaling via  
855 CD36 by recruiting SHP-1 to VEGFR2 complex in microvascular endothelial cells. *Blood* **122**, 1822-  
856 1832, doi:10.1182/blood-2013-01-482315 (2013).
- 857 35 Lopez-Dee, Z., Pidcock, K. & Gutierrez, L. S. Thrombospondin-1: multiple paths to inflammation.  
858 *Mediators Inflamm* **2011**, 296069, doi:10.1155/2011/296069 (2011).
- 859 36 Li, Y., Qi, X., Tong, X. & Wang, S. Thrombospondin 1 activates the macrophage Toll-like receptor 4  
860 pathway. *Cell Mol Immunol* **10**, 506-512, doi:10.1038/cmi.2013.32 (2013).
- 861 37 Ganguly, R. *et al.* TSP-1 (Thrombospondin-1) Deficiency Protects ApoE(-/-) Mice Against Leptin-  
862 Induced Atherosclerosis. *Arterioscler Thromb Vasc Biol* **41**, e112-e127,  
863 doi:10.1161/ATVBAHA.120.314962 (2021).
- 864 38 Ganguly, R. *et al.* Oral chromium picolinate impedes hyperglycemia-induced atherosclerosis and inhibits  
865 proatherogenic protein TSP-1 expression in STZ-induced type 1 diabetic ApoE(-/-) mice. *Sci Rep* **7**,  
866 45279, doi:10.1038/srep45279 (2017).
- 867 39 Du, J., Xie, J. & Yue, L. Intracellular calcium activates TRPM2 and its alternative spliced isoforms. *Proc*  
868 *Natl Acad Sci U S A* **106**, 7239-7244, doi:10.1073/pnas.0811725106 (2009).
- 869 40 Sumoza-Toledo, A. & Penner, R. TRPM2: a multifunctional ion channel for calcium signalling. *J Physiol*  
870 **589**, 1515-1525, doi:10.1113/jphysiol.2010.201855 (2011).
- 871 41 Leung, A. W. Y., Chan, R. S. M., Sea, M. M. M. & Woo, J. An Overview of Factors Associated with  
872 Adherence to Lifestyle Modification Programs for Weight Management in Adults. *Int J Environ Res*  
873 *Public Health* **14**, doi:10.3390/ijerph14080922 (2017).
- 874 42 Gill, R., Tsung, A. & Billiar, T. Linking oxidative stress to inflammation: Toll-like receptors. *Free Radic*  
875 *Biol Med* **48**, 1121-1132, doi:10.1016/j.freeradbiomed.2010.01.006 (2010).
- 876 43 Belrose, J. C. & Jackson, M. F. TRPM2: a candidate therapeutic target for treating neurological diseases.  
877 *Acta Pharmacol Sin* **39**, 722-732, doi:10.1038/aps.2018.31 (2018).
- 878 44 Jeurissen, M. L. J. *et al.* Prevention of oxLDL uptake leads to decreased atherosclerosis in hematopoietic  
879 NPC1-deficient Ldlr(-/-) mice. *Atherosclerosis* **255**, 59-65, doi:10.1016/j.atherosclerosis.2016.10.038  
880 (2016).

- 881 45 Rahaman, S. O., Zhou, G. & Silverstein, R. L. Vav protein guanine nucleotide exchange factor regulates  
882 CD36 protein-mediated macrophage foam cell formation via calcium and dynamin-dependent processes.  
883 *The Journal of biological chemistry* **286**, 36011-36019, doi:10.1074/jbc.M111.265082 (2011).  
884 46 Zhong, Z. *et al.* TRPM2 links oxidative stress to NLRP3 inflammasome activation. *Nature*  
885 *communications* **4**, 1611, doi:10.1038/ncomms2608 (2013).  
886 47 Murakami, T. *et al.* Critical role for calcium mobilization in activation of the NLRP3 inflammasome.  
887 *Proc Natl Acad Sci U S A* **109**, 11282-11287, doi:10.1073/pnas.1117765109 (2012).  
888 48 Sun, Y. *et al.* A Human Platelet Receptor Protein Microarray Identifies the High Affinity  
889 Immunoglobulin E Receptor Subunit alpha (FcepsilonR1alpha) as an Activating Platelet Endothelium  
890 Aggregation Receptor 1 (PEAR1) Ligand. *Mol Cell Proteomics* **14**, 1265-1274,  
891 doi:10.1074/mcp.M114.046946 (2015).

892
